# Supplementary material for: Influence of a series of pyridine ligands on the structure and photophysical properties of Cd(ii) complexes
Source: Royal Society of Chemistry journal article supplement (doi:10.1039/d1ce01584b), 2022-01-01
Supplement: d1ce01584b1.pdf [file d1ce01584b1.pdf]

## Supporting Information

# Influence of a series of pyridine ligands on the structure and photophysical properties of Cd(II) complexes

*Daniel Ejarque<sup>a</sup>, Teresa Calvet<sup>b</sup>, Mercè Font-Bardia<sup>c</sup>, and Josefina Pons<sup>a,\*</sup>*

<sup>a</sup>Departament de Química, Universitat Autònoma de Barcelona, 08193-Bellaterra, Barcelona, Spain

<sup>b</sup>Departament de Mineralogia, Petrologia i Geologia Aplicada, Universitat de Barcelona, Martí i Franquès s/n, 08028 Barcelona, Spain

<sup>c</sup>Unitat de Difracció de Raig-X, Centres Científics i Tecnològics de la Universitat de Barcelona (CCiTUB), Universitat de Barcelona, Solé i Sabarís, 1-3, 08028 Barcelona, Spain

\*Corresponding author E-mail: josefina.pons@uab.es

## List of figures

|                                                                                                                                                                                                                                           |     |
|-------------------------------------------------------------------------------------------------------------------------------------------------------------------------------------------------------------------------------------------|-----|
| Figure S1. FTIR-ATR spectrum of compound $[\text{Cd}(\mu\text{-O},\text{O}'\text{-ACA})(\text{ACA})(\text{py})]_n$ ( <b>1</b> ).                                                                                                          | S3  |
| Figure S2. FTIR-ATR spectrum of compound $[\text{Cd}(\text{ACA})_2(3\text{-phpy})_2(\text{H}_2\text{O})_2] \cdot 2\text{H}_2\text{O}$ ( <b>2</b> ).                                                                                       | S4  |
| Figure S3. FTIR-ATR spectrum of compound $[\text{Cd}(\text{ACA})_2(2,2'\text{-bipy})]_2 \cdot 2\text{MeOH}$ ( <b>3</b> ).                                                                                                                 | S4  |
| Figure S4. FTIR-ATR spectrum of compound $[\text{Cd}(\text{ACA})_2(1,10\text{-phen})] \cdot 3\text{EtOH}$ ( <b>4</b> ).                                                                                                                   | S5  |
| Figure S5. FTIR-ATR spectrum of compound $[\text{Cd}(\text{ACA})_2(\text{terpy})] \cdot 2\text{DMF}$ ( <b>5</b> ).                                                                                                                        | S5  |
| Figure S6. $^1\text{H}$ NMR spectrum of compound $[\text{Cd}(\mu\text{-O},\text{O}'\text{-ACA})(\text{ACA})(\text{py})]_n$ ( <b>1</b> ) recorded at 298 K in $\text{DMSO-}d_6$ .                                                          | S6  |
| Figure S7. $^1\text{H}$ NMR spectrum of compound $[\text{Cd}(\text{ACA})_2(3\text{-phpy})_2(\text{H}_2\text{O})_2] \cdot 2\text{H}_2\text{O}$ ( <b>2</b> ) recorded at 298 K in $\text{DMSO-}d_6$ .                                       | S6  |
| Figure S8. $^1\text{H}$ NMR spectrum of compound $[\text{Cd}(\text{ACA})_2(2,2'\text{-bipy})]_2 \cdot 2\text{MeOH}$ ( <b>3</b> ) recorded at 298 K in $\text{DMSO-}d_6$ .                                                                 | S7  |
| Figure S9. $^1\text{H}$ NMR spectrum of compound $[\text{Cd}(\text{ACA})_2(1,10\text{-phen})] \cdot 3\text{EtOH}$ ( <b>4</b> ) recorded at 298 K in $\text{DMSO-}d_6$ .                                                                   | S7  |
| Figure S10. $^1\text{H}$ NMR spectrum of compound $[\text{Cd}(\text{ACA})_2(\text{terpy})] \cdot 2\text{DMF}$ ( <b>5</b> ) recorded at 340 K in $\text{DMSO-}d_6$ .                                                                       | S8  |
| Figure S11. Temperature-Dependent $^1\text{H}$ NMR spectrum of compound $[\text{Cd}(\text{ACA})_2(\text{terpy})] \cdot 2\text{DMF}$ ( <b>5</b> ) in $\text{DMSO-}d_6$ .                                                                   | S8  |
| Figure S12. (a) $^{13}\text{C}\{^1\text{H}\}$ and (b) DEPT-135 NMR spectra of compound $[\text{Cd}(\mu\text{-O},\text{O}'\text{-ACA})(\text{ACA})(\text{py})]_n$ ( <b>1</b> ) recorded at 298 K in $\text{DMSO-}d_6$ .                    | S9  |
| Figure S13. (a) $^{13}\text{C}\{^1\text{H}\}$ and (b) DEPT-135 NMR spectra of compound $[\text{Cd}(\text{ACA})_2(3\text{-phpy})_2(\text{H}_2\text{O})_2] \cdot 2\text{H}_2\text{O}$ ( <b>2</b> ) recorded at 298 K in $\text{DMSO-}d_6$ . | S10 |
| Figure S14. (a) $^{13}\text{C}\{^1\text{H}\}$ and (b) DEPT-135 NMR spectra of compound $[\text{Cd}(\text{ACA})_2(2,2'\text{-bipy})]_2 \cdot 2\text{MeOH}$ ( <b>3</b> ) recorded at 298 K in $\text{DMSO-}d_6$ .                           | S11 |
| Figure S15. (a) $^{13}\text{C}\{^1\text{H}\}$ and (b) DEPT-135 NMR spectra of compound $[\text{Cd}(\text{ACA})_2(1,10\text{-phen})] \cdot 3\text{EtOH}$ ( <b>4</b> ) recorded at 298 K in $\text{DMSO-}d_6$ .                             | S12 |
| Figure S16. (a) $^{13}\text{C}\{^1\text{H}\}$ and (b) DEPT-135 NMR spectra of compound $[\text{Cd}(\text{ACA})_2(\text{terpy})] \cdot 2\text{DMF}$ ( <b>5</b> ) recorded at 298 K in $\text{DMSO-}d_6$ .                                  | S13 |
| Figure S17. $^1\text{H}$ NMR spectrum of compound $[\text{Cd}(\mu\text{-O},\text{O}'\text{-ACA})(\text{ACA})(\text{py})]_n$ ( <b>1</b> ) recorded at 298 K in $\text{MeOH-}d_4$ .                                                         | S14 |
| Figure S18. $^1\text{H}$ NMR spectrum of compound $[\text{Cd}(\text{ACA})_2(3\text{-phpy})_2(\text{H}_2\text{O})_2] \cdot 2\text{H}_2\text{O}$ ( <b>2</b> ) recorded at 298 K in $\text{MeOH-}d_4$ .                                      | S14 |
| Figure S19. (a) $^{13}\text{C}\{^1\text{H}\}$ and (b) DEPT-135 NMR spectra of compound $[\text{Cd}(\mu\text{-O},\text{O}'\text{-ACA})(\text{ACA})(\text{py})]_n$ ( <b>1</b> ) recorded at 298 K in $\text{MeOH-}d_4$ .                    | S15 |
| Figure S20. (a) $^{13}\text{C}\{^1\text{H}\}$ and (b) DEPT-135 NMR spectra of compound $[\text{Cd}(\text{ACA})_2(3\text{-phpy})_2(\text{H}_2\text{O})_2] \cdot 2\text{H}_2\text{O}$ ( <b>2</b> ) recorded at 298 K in $\text{MeOH-}d_4$ . | S16 |
| Figure S21. UV-Vis spectra of (a) HACA ligand and (b) ACA- anion recorded at 298K, within a concentration range from $\sim 1 \cdot 10^{-9}$ to $\sim 1 \cdot 10^{-4}$ M.                                                                  | S21 |
| Figure S22. UV-Vis spectra of dPy ligands: (a) py; (b) 3-phpy; (c) 2,2'-bipy; (d) 1,10-phen and (e) terpy recorded at 298K, within a concentration range from $\sim 1 \cdot 10^{-9}$ to $\sim 1 \cdot 10^{-4}$ M.                         | S21 |
| Figure S23. UV-Vis spectra of complexes <b>1-5</b> recorded at 298K, within a concentration range from $\sim 1 \cdot 10^{-9}$ to $\sim 1 \cdot 10^{-4}$ M. (a) <b>1</b> ; (b) <b>2</b> ; (c) <b>3</b> ; (d) <b>4</b> and (e) <b>5</b> .   | S22 |
| Figure S24. UV-Vis spectra of standards (a) L-tyrosine (L-tyr) and (b) quinine sulphate (QS) recorded at 298K, within a concentration range from $\sim 1 \cdot 10^{-9}$ to $\sim 1 \cdot 10^{-4}$ M.                                      | S22 |
| Figure S25. UV-Vis spectra of complexes <b>1-5</b> recorded at 298 K at a concentration of $1.00 \cdot 10^{-7}$ M.                                                                                                                        | S23 |
| Figure S26. CIE 1931 chromaticity diagram of compounds <b>1-5</b> .                                                                                                                                                                       | S23 |
| Figure S27. Emission spectra of <b>1</b> and their corresponding ligands (HACA and py) irradiated at the excitation maxima of <b>1</b> using $1.00 \cdot 10^{-7}$ M solutions.                                                            | S24 |
| Figure S28. Emission spectra of <b>2</b> and their corresponding ligands (HACA and 3-phpy) irradiated at the excitation maxima of <b>2</b> using $1.00 \cdot 10^{-7}$ M solutions.                                                        | S24 |
| Figure S29. Emission spectra of <b>3</b> and their corresponding ligands (HACA and 2,2'-bipy) irradiated at the excitation maxima of <b>3</b> using $1.00 \cdot 10^{-7}$ M solutions.                                                     | S25 |
| Figure S30. Emission spectra of <b>4</b> and their corresponding ligands (HACA and 1,10-phen) irradiated at the excitation maxima of <b>4</b> using $1.00 \cdot 10^{-7}$ M solutions.                                                     | S25 |
| Figure S31. Emission spectra of <b>5</b> and their corresponding ligands (HACA and terpy) irradiated at the excitation maxima of <b>5</b> using $1.00 \cdot 10^{-7}$ M solutions.                                                         | S26 |

## List of tables

|                                                                                                                             |     |
|-----------------------------------------------------------------------------------------------------------------------------|-----|
| Table S1. Selected bond lengths (Å), bond angles (°), intra- and intermolecular interactions (Å) for <b>1</b> .             | S17 |
| Table S2. Selected bond lengths (Å), bond and torsion angles (°), intra- and intermolecular interactions (Å) for <b>2</b> . | S18 |
| Table S3. Selected bond lengths (Å); bond and torsion angles (°); intra- and intermolecular interactions (Å) for <b>3</b> . | S18 |
| Table S4. Selected bond lengths (Å), bond and torsion angles (°), and intermolecular interactions (Å) for <b>4</b> .        | S19 |
| Table S5. Selected bond lengths (Å), bond and torsion angles (°), and intermolecular interactions (Å) for <b>5</b> .        | S20 |
| Table S6. Structural parameters regarding the steric effects of the ligands in <b>1-5</b> <sup>a</sup> .                    | S20 |
| Table S7. Detailed parameters extracted from the photophysical properties of L-tyr, QS, HACA and dPy ligands <sup>a</sup> . | S26 |

## FTIR-ATR, <sup>1</sup>H, <sup>13</sup>C{<sup>1</sup>H} and DEPT-135 NMR spectroscopies

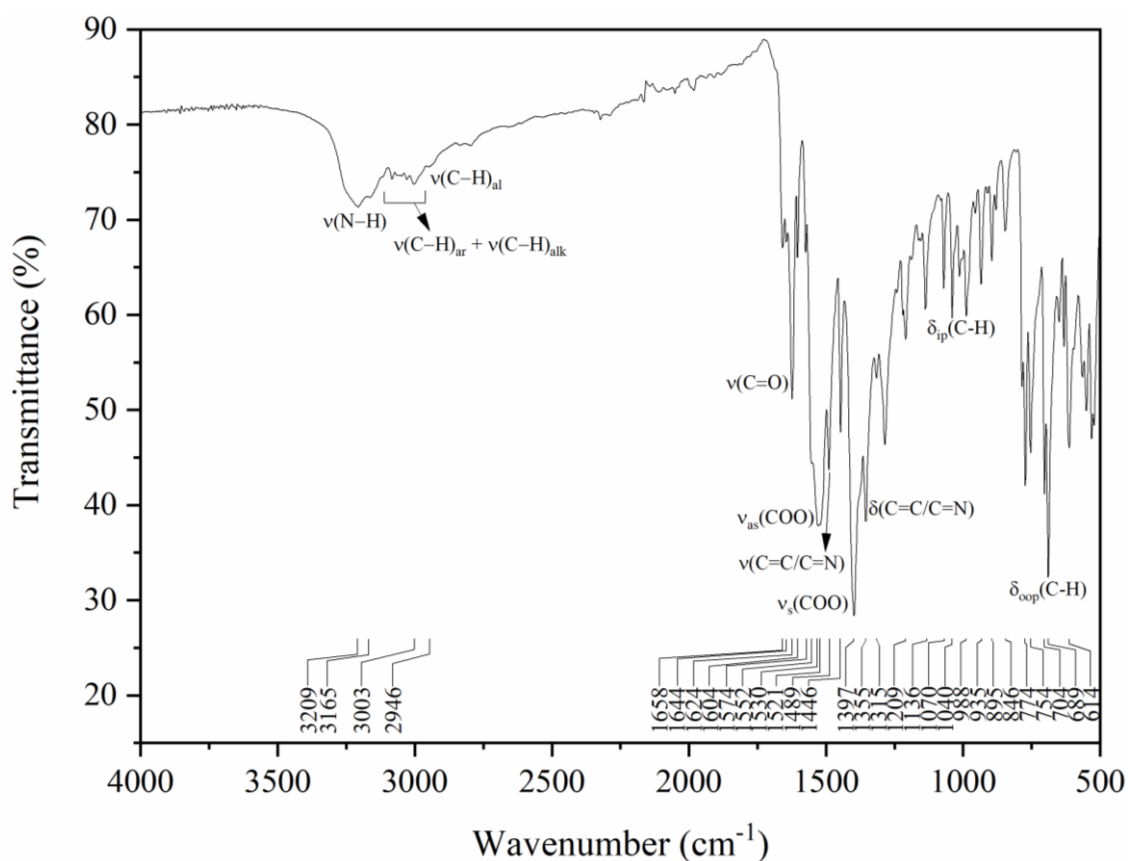

Figure S1. FTIR-ATR spectrum of compound  $[\text{Cd}(\mu\text{-O}, \text{O}^{\prime}\text{-ACA})(\text{ACA})(\text{py})]_n$  (**1**).

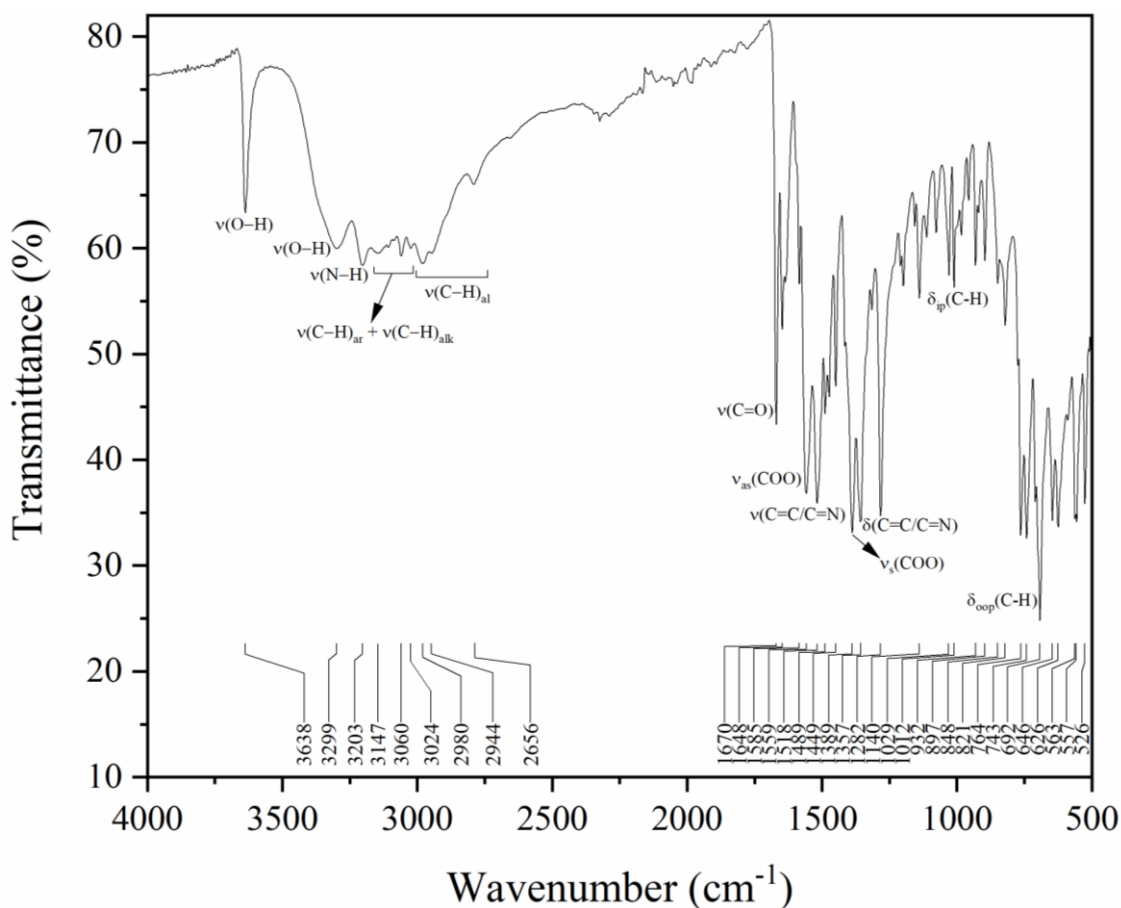

Figure S2. FTIR-ATR spectrum of compound  $[\text{Cd}(\text{ACA})_2(3\text{-ppy})_2(\text{H}_2\text{O})_2] \cdot 2\text{H}_2\text{O}$  (**2**).

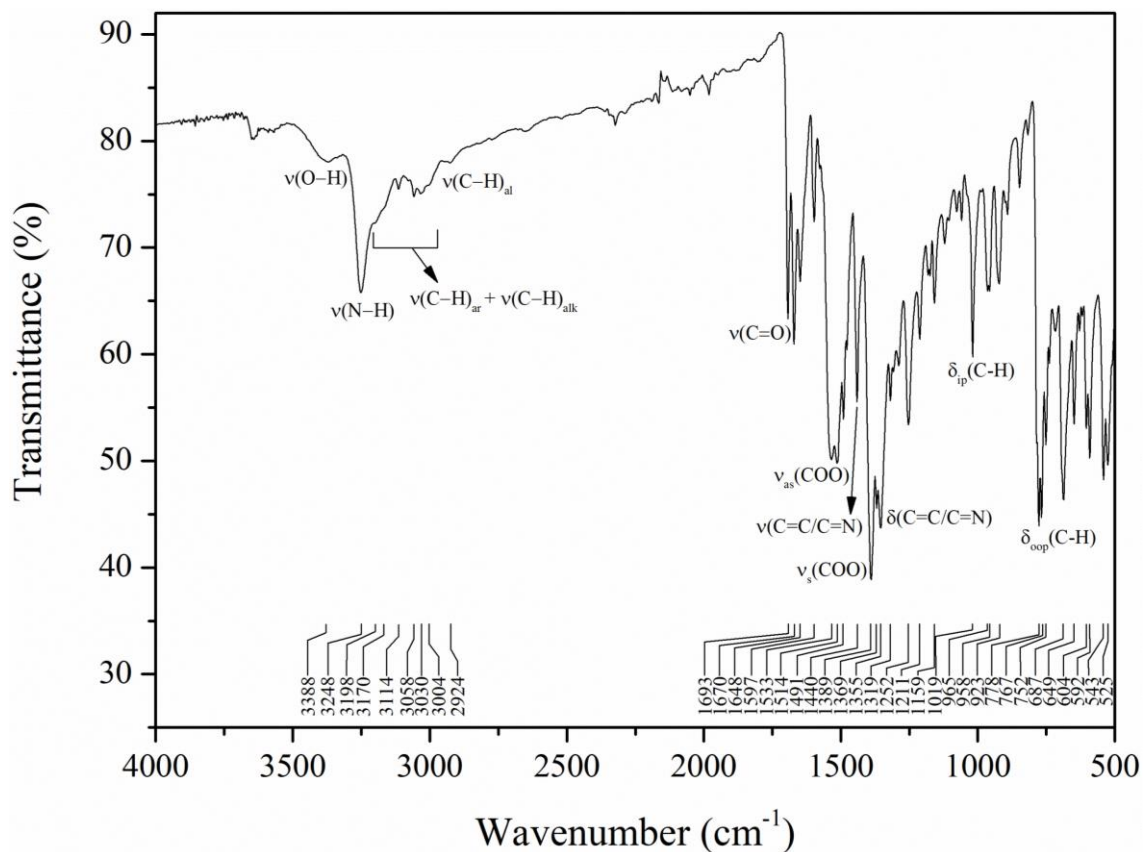

Figure S3. FTIR-ATR spectrum of compound  $[\text{Cd}(\text{ACA})_2(2,2'\text{-bipy})_2] \cdot 2\text{MeOH}$  (**3**).

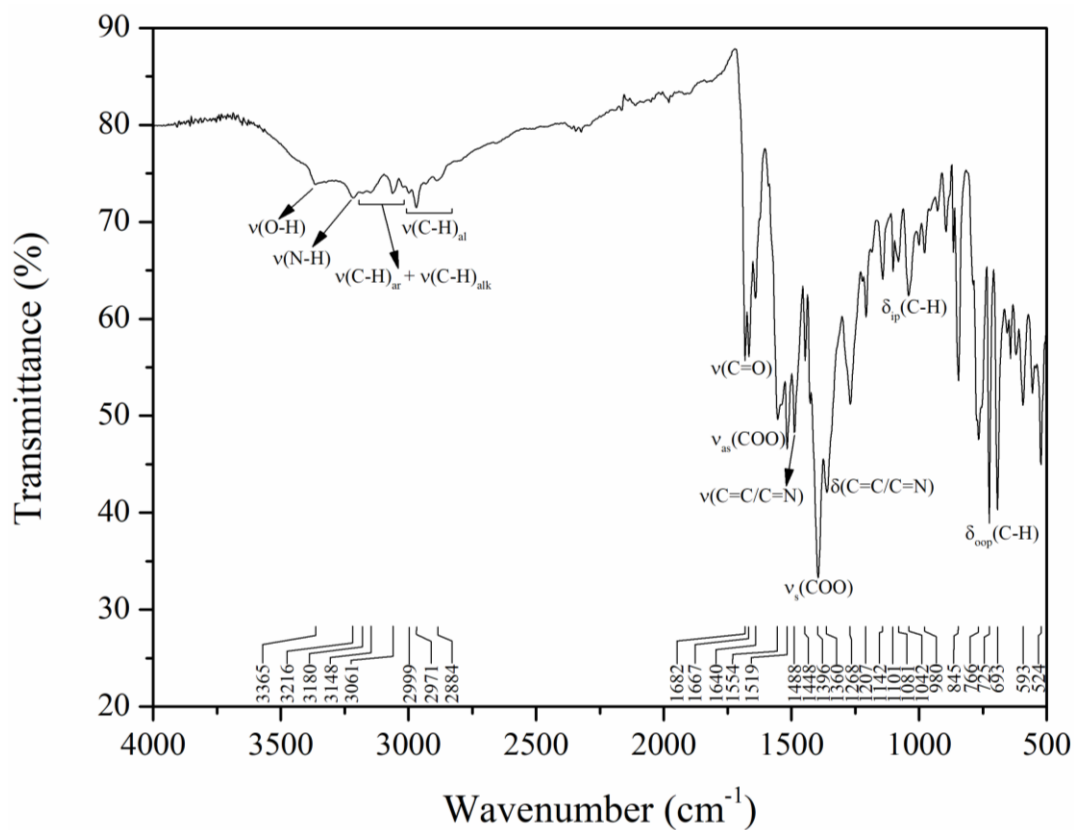

Figure S4. FTIR-ATR spectrum of compound  $[\text{Cd}(\text{ACA})_2(1,10\text{-phen})] \cdot 3\text{EtOH}$  (**4**).

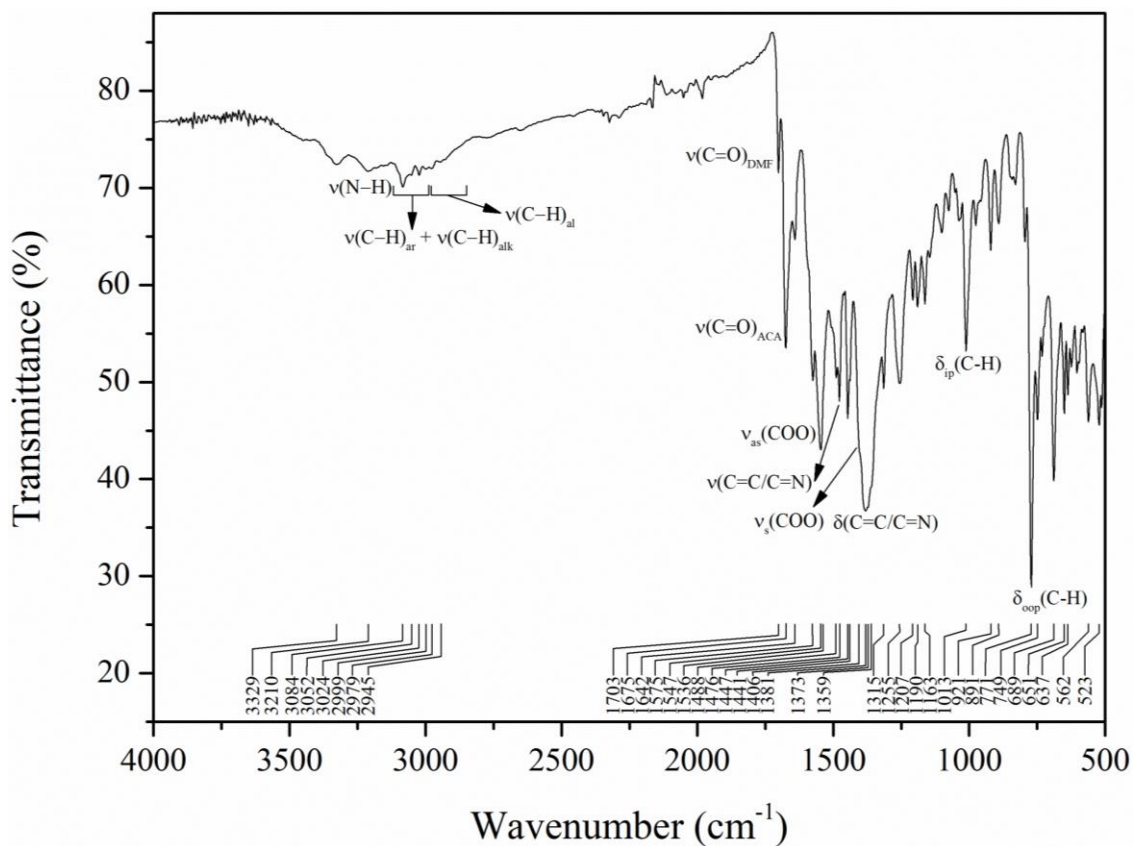

Figure S5. FTIR-ATR spectrum of compound  $[\text{Cd}(\text{ACA})_2(\text{terpy})] \cdot 2\text{DMF}$  (**5**).

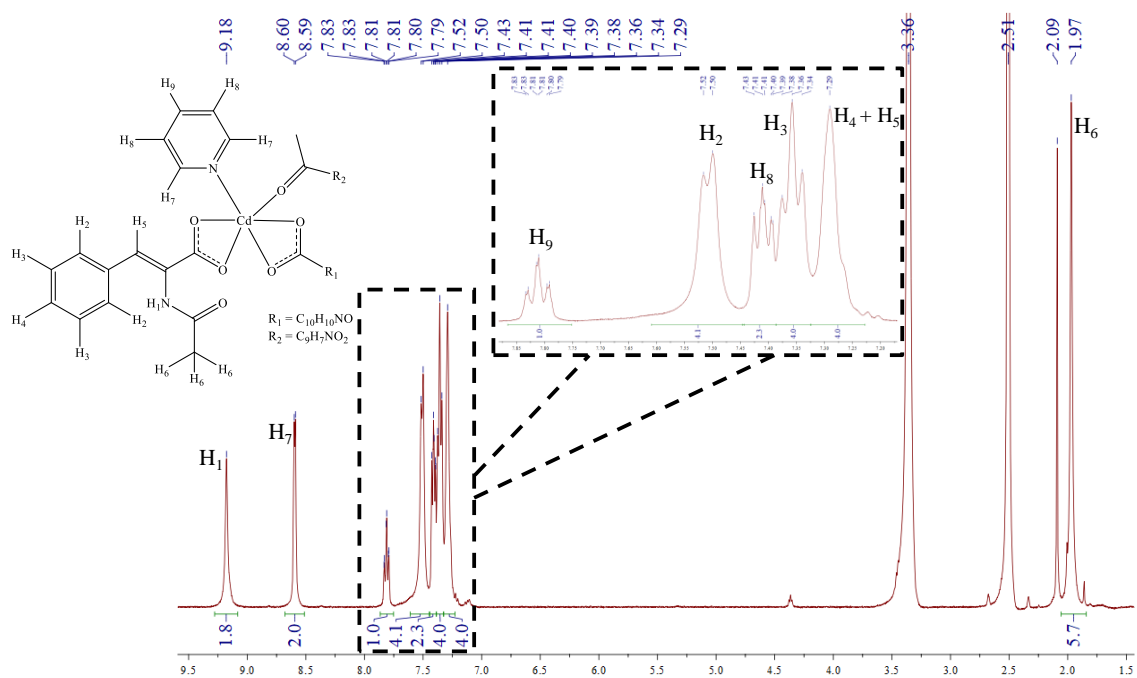

Figure S6.  $^1\text{H}$  NMR spectrum of compound  $[\text{Cd}(\mu\text{-O},\text{O}'\text{-ACA})(\text{ACA})(\text{py})]_n$  (**1**) recorded at 298 K in  $\text{DMSO-}d_6$ .

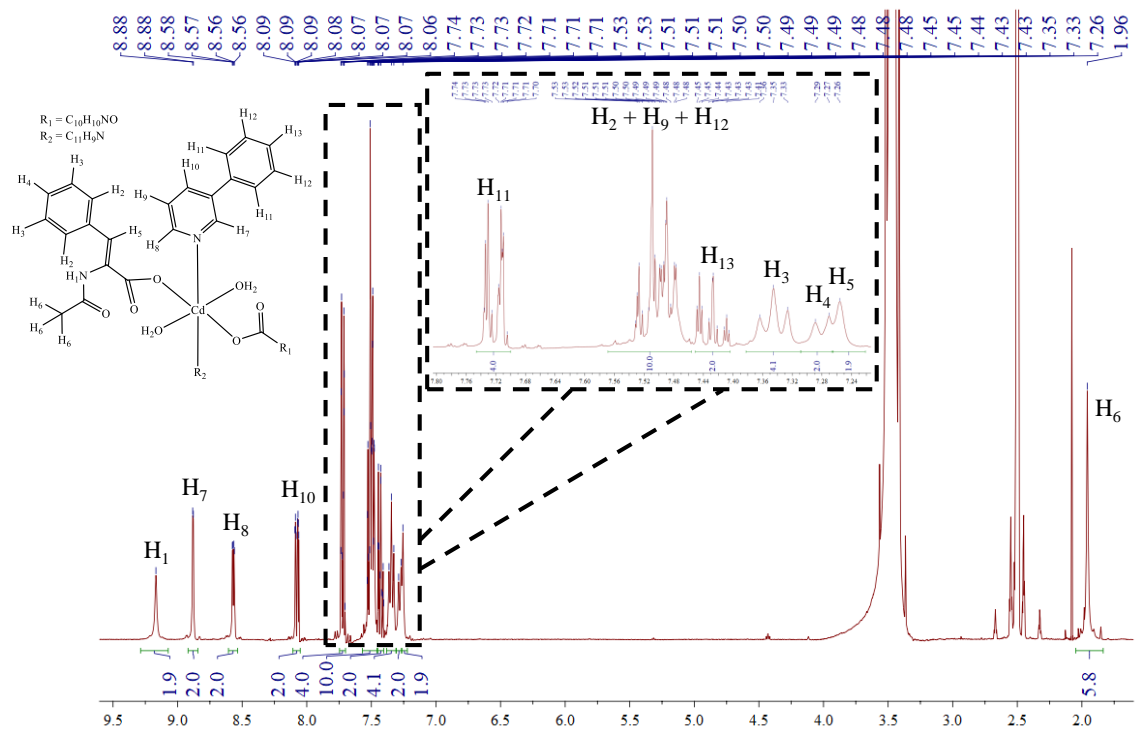

Figure S7.  $^1\text{H}$  NMR spectrum of compound  $[\text{Cd}(\text{ACA})_2(3\text{-ppy})_2(\text{H}_2\text{O})_2] \cdot 2\text{H}_2\text{O}$  (**2**) recorded at 298 K in  $\text{DMSO-}d_6$ .



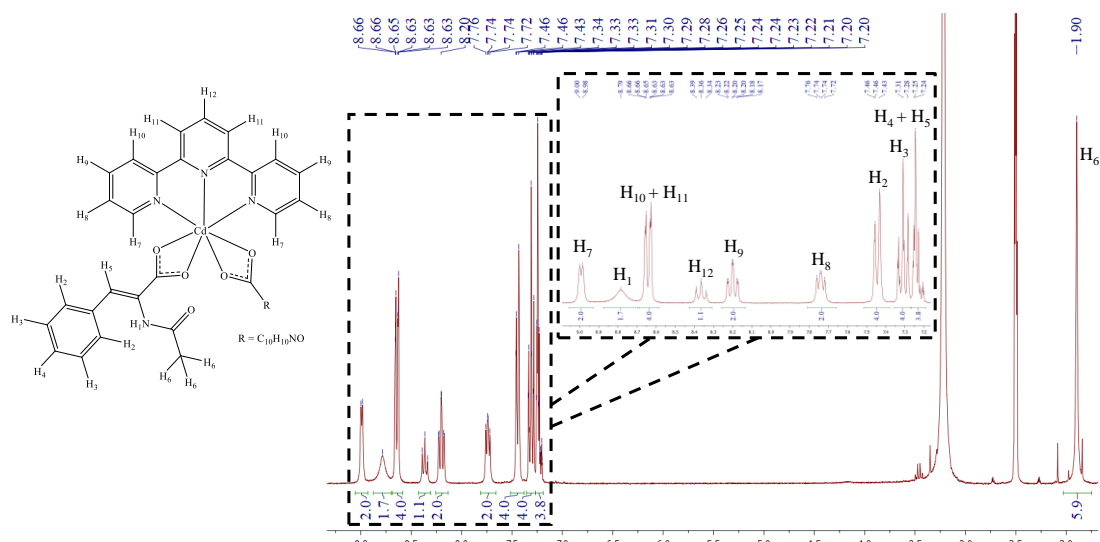

Figure S10.  $^1H$  NMR spectrum of compound  $[Cd(ACA)_2(terpy)] \cdot 2DMF$  (**5**) recorded at 340 K in  $DMSO-d_6$ .

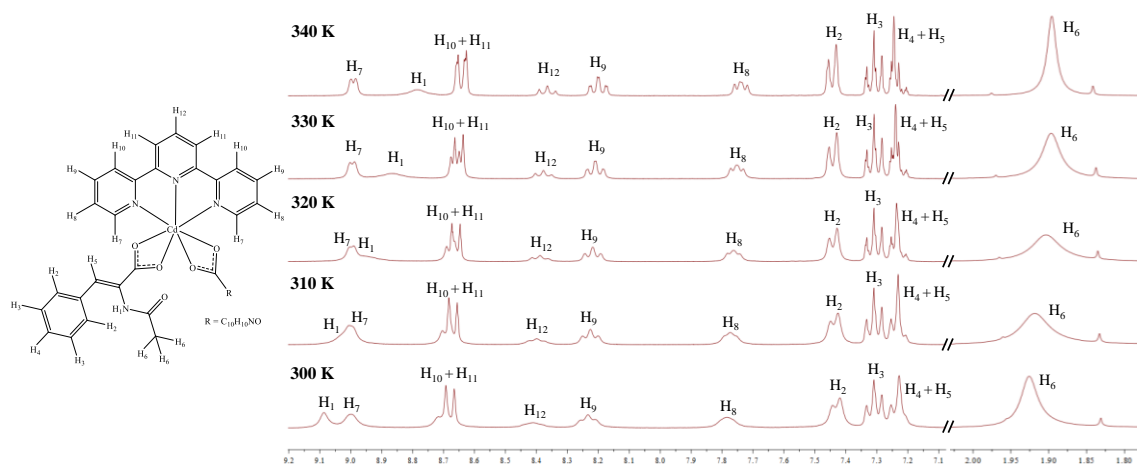

Figure S11. Temperature-Dependent  $^1H$  NMR spectrum of compound  $[Cd(ACA)_2(terpy)] \cdot 2DMF$  (**5**) in  $DMSO-d_6$ .



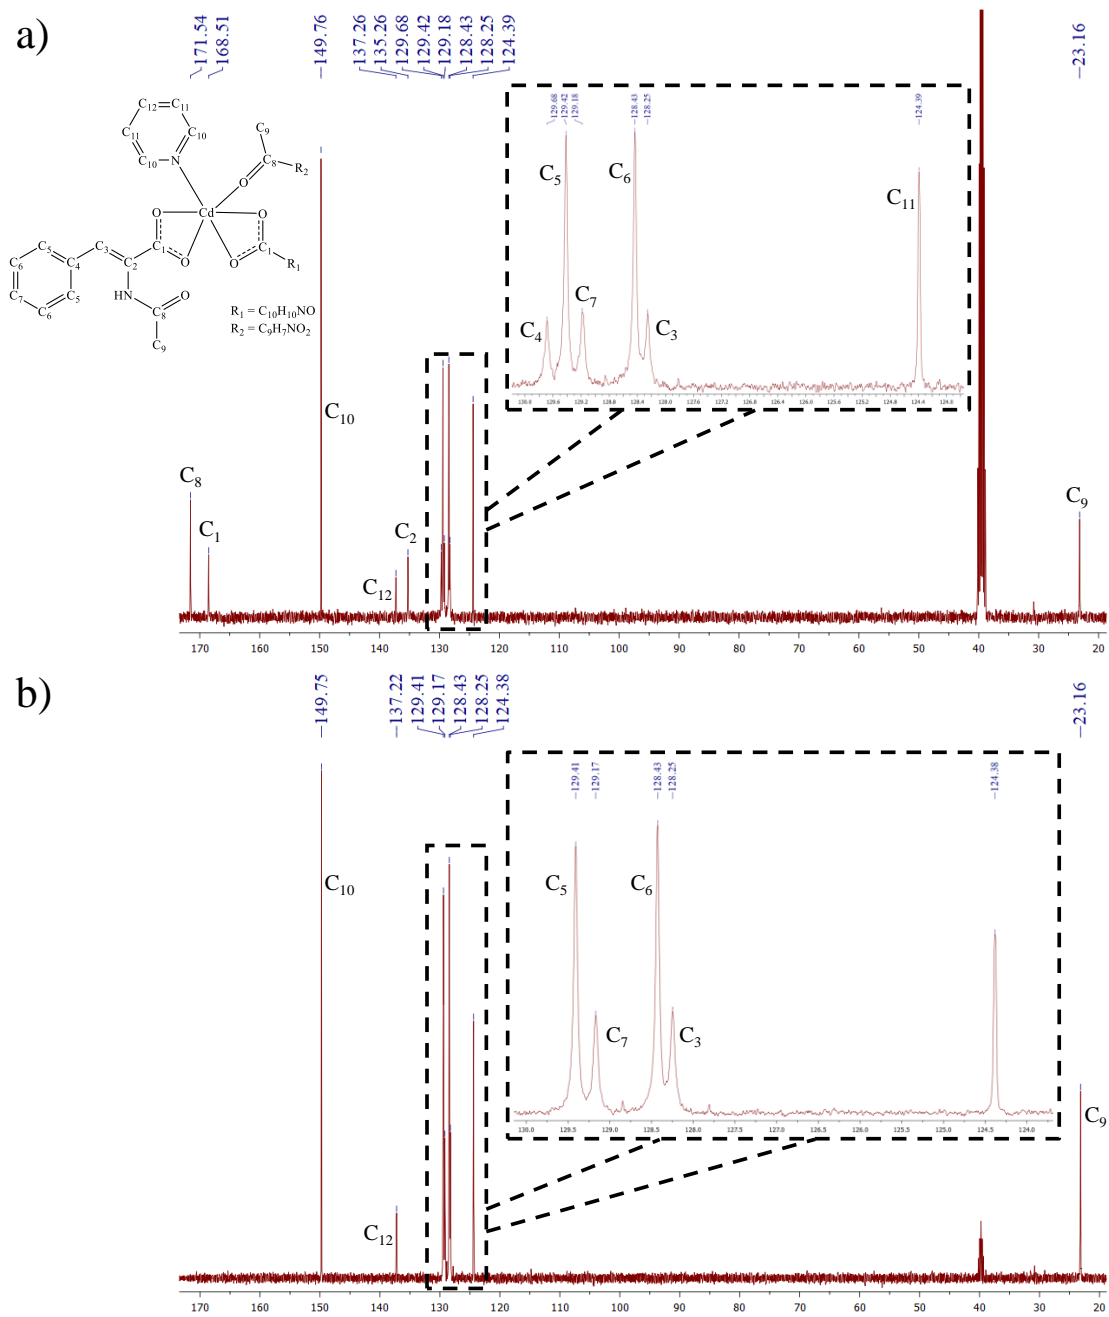

Figure S12. (a)  $^{13}\text{C}\{^1\text{H}\}$  and (b) DEPT-135 NMR spectra of compound  $[\text{Cd}(\mu\text{-O},\text{O}'\text{-ACA})(\text{ACA})(\text{py})]_n$  (**1**) recorded at 298 K in  $\text{DMSO-}d_6$ .

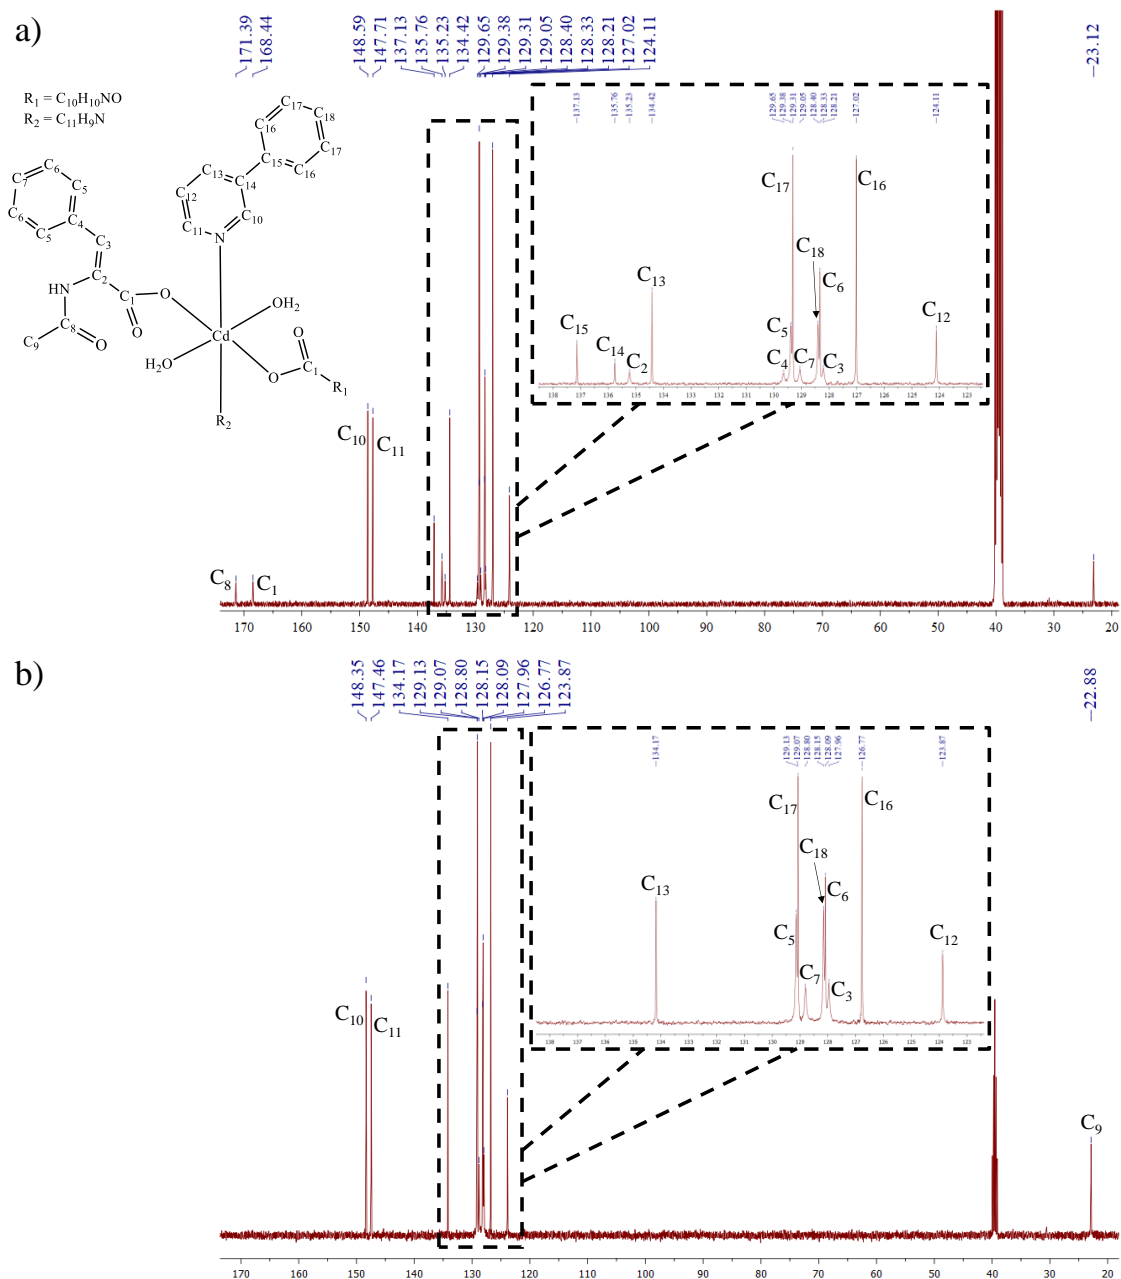

Figure S13. (a)  $^{13}C\{^1H\}$  and (b) DEPT-135 NMR spectra of compound  $[Cd(ACA)_2(3\text{-phpy})_2(H_2O)_2] \cdot 2 H_2O$  (2) recorded at 298 K in  $DMSO-d_6$ .

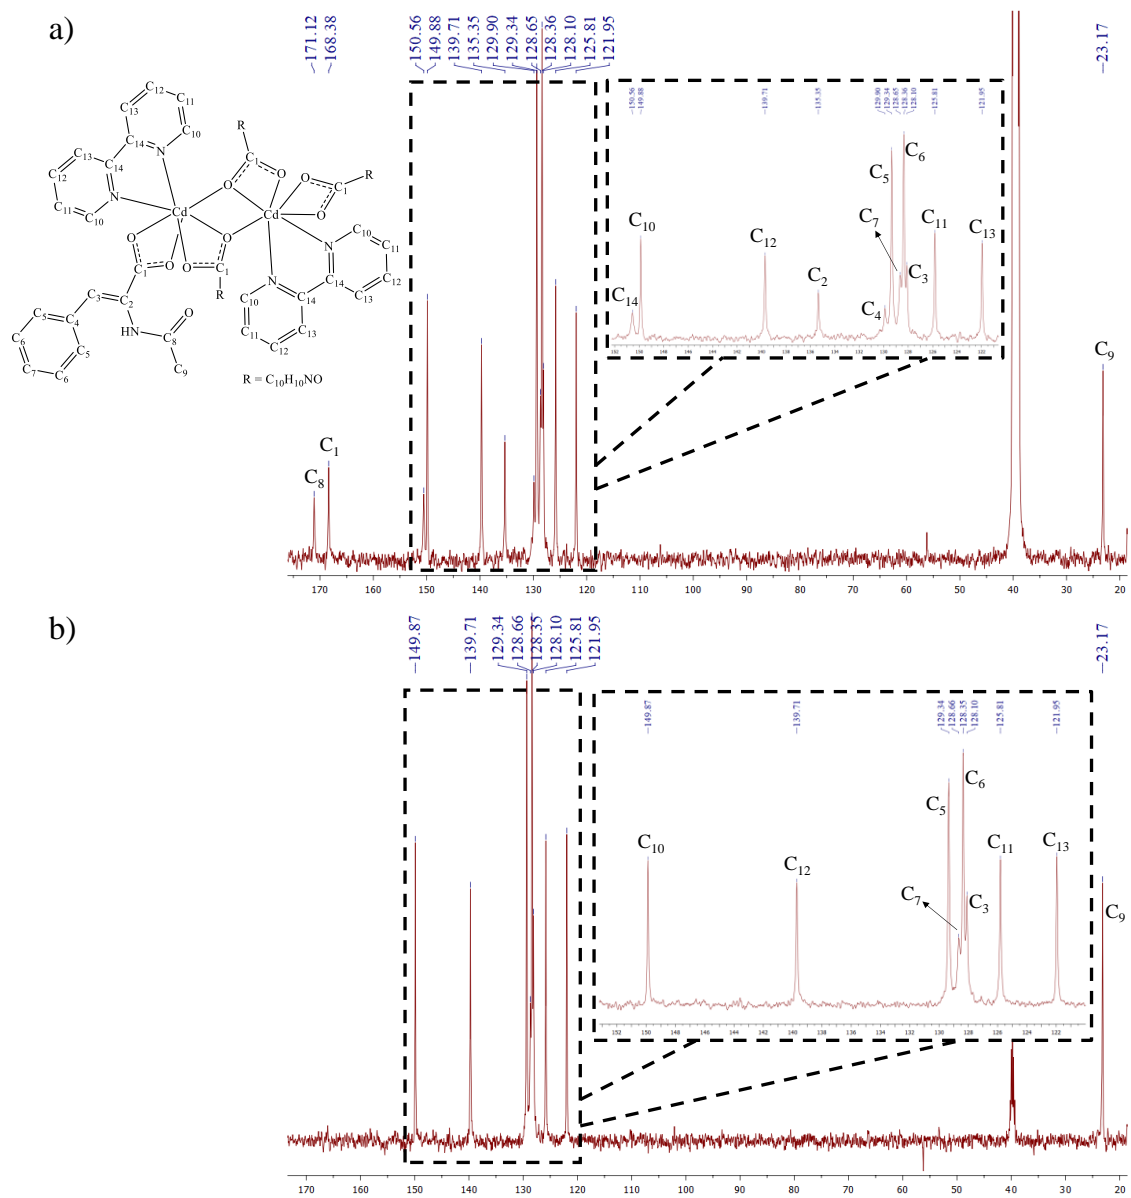

Figure S14. (a)  $^{13}\text{C}\{^1\text{H}\}$  and (b) DEPT-135 NMR spectra of compound  $[\text{Cd}(\text{ACA})_2(2,2'\text{-bipy})]_2 \cdot 2\text{MeOH}$  (**3**) recorded at 298 K in  $\text{DMSO-}d_6$ .

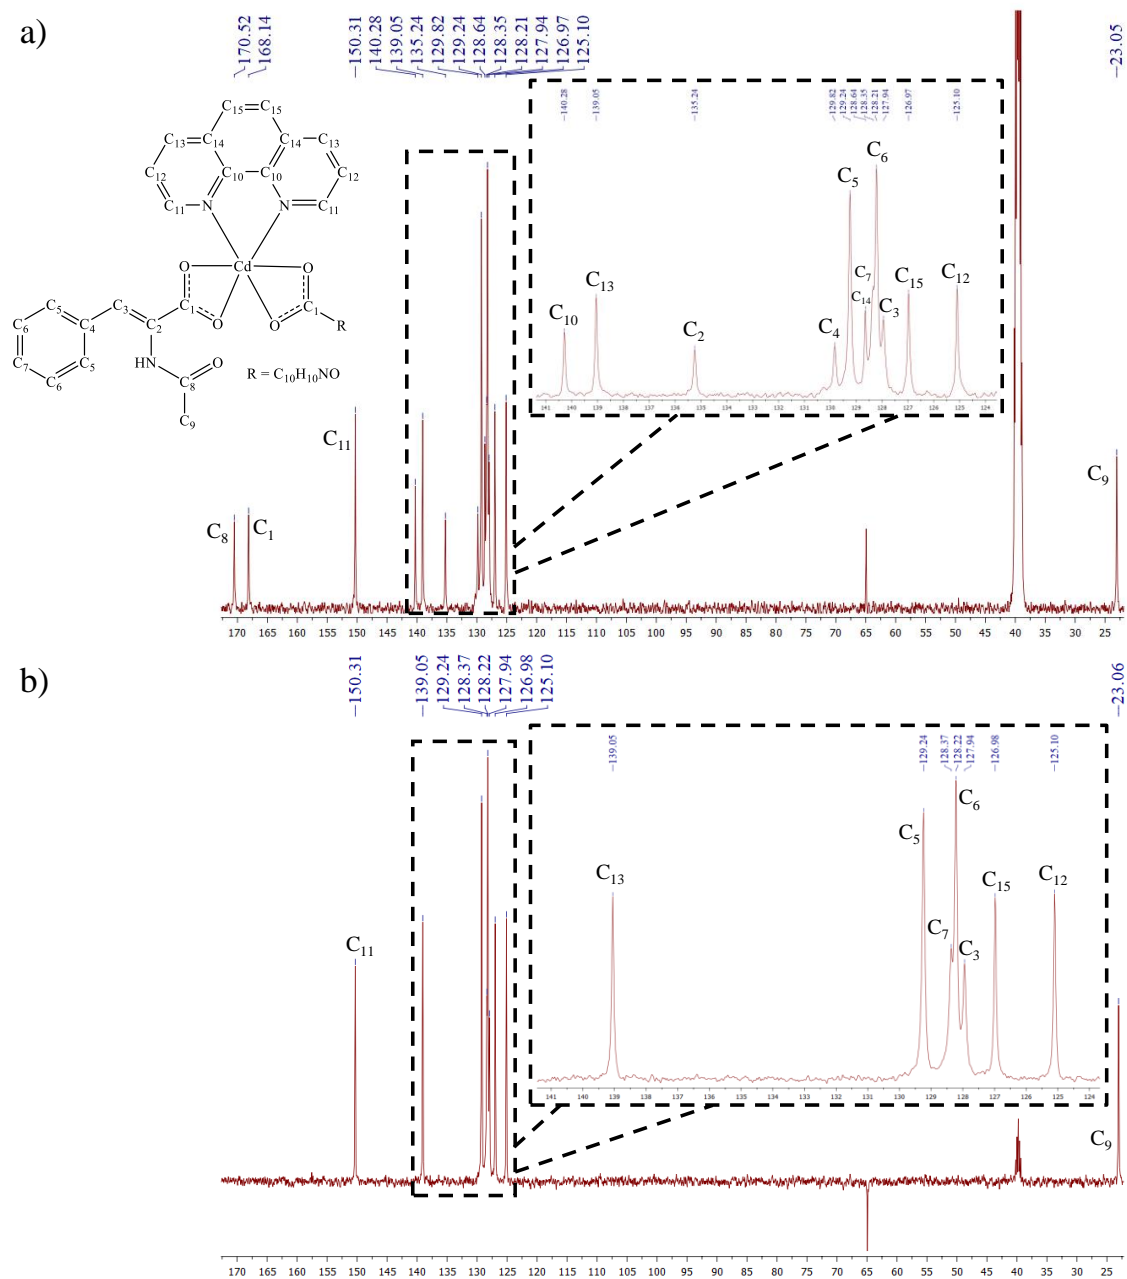

Figure S15. (a)  $^{13}\text{C}\{^1\text{H}\}$  and (b) DEPT-135 NMR spectra of compound  $[\text{Cd}(\text{ACA})_2(1,10\text{-phen})]\cdot 3\text{EtOH}$  (**4**) recorded at 298 K in  $\text{DMSO-}d_6$ .

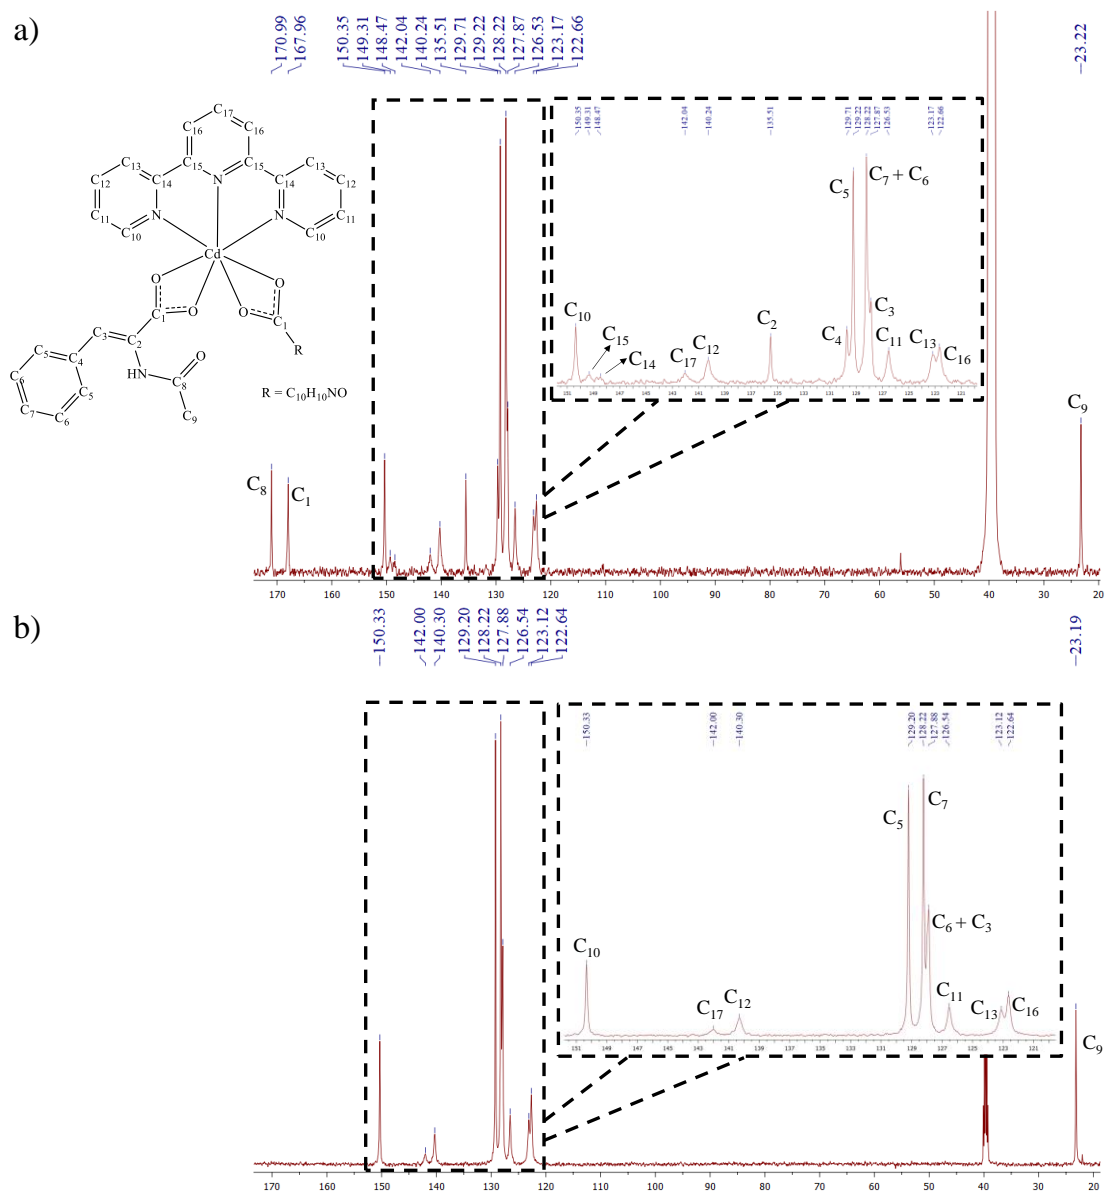

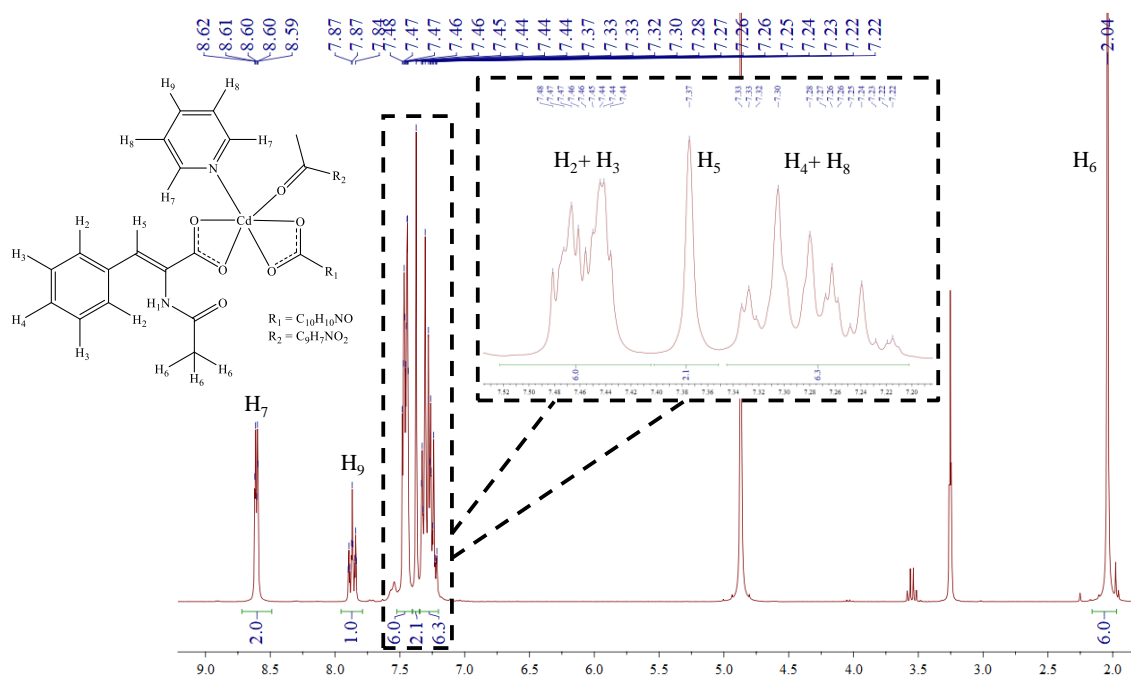

Figure S17.  $^1\text{H}$  NMR spectrum of compound  $[\text{Cd}(\mu\text{-O},\text{O}'\text{-ACA})(\text{ACA})(\text{py})]_n$  (**1**) recorded at 298 K in  $\text{MeOH-}d_4$ .

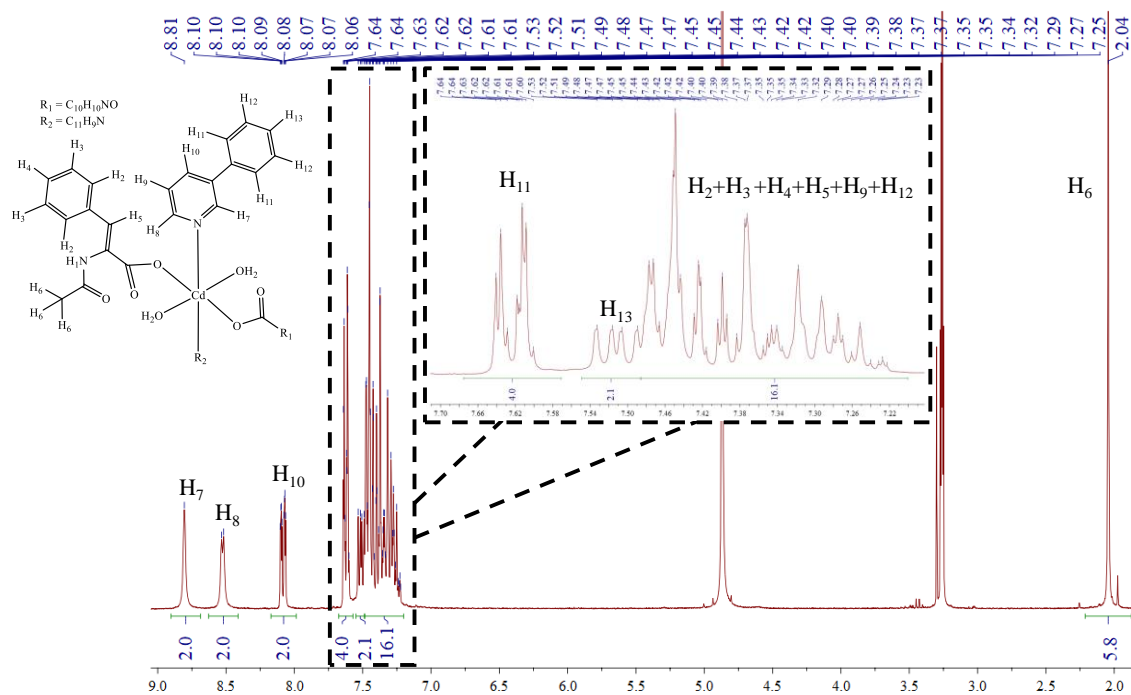

Figure S18.  $^1\text{H}$  NMR spectrum of compound  $[\text{Cd}(\text{ACA})_2(3\text{-ppy})_2(\text{H}_2\text{O})_2] \cdot 2\text{H}_2\text{O}$  (**2**) recorded at 298 K in  $\text{MeOH-}d_4$ .

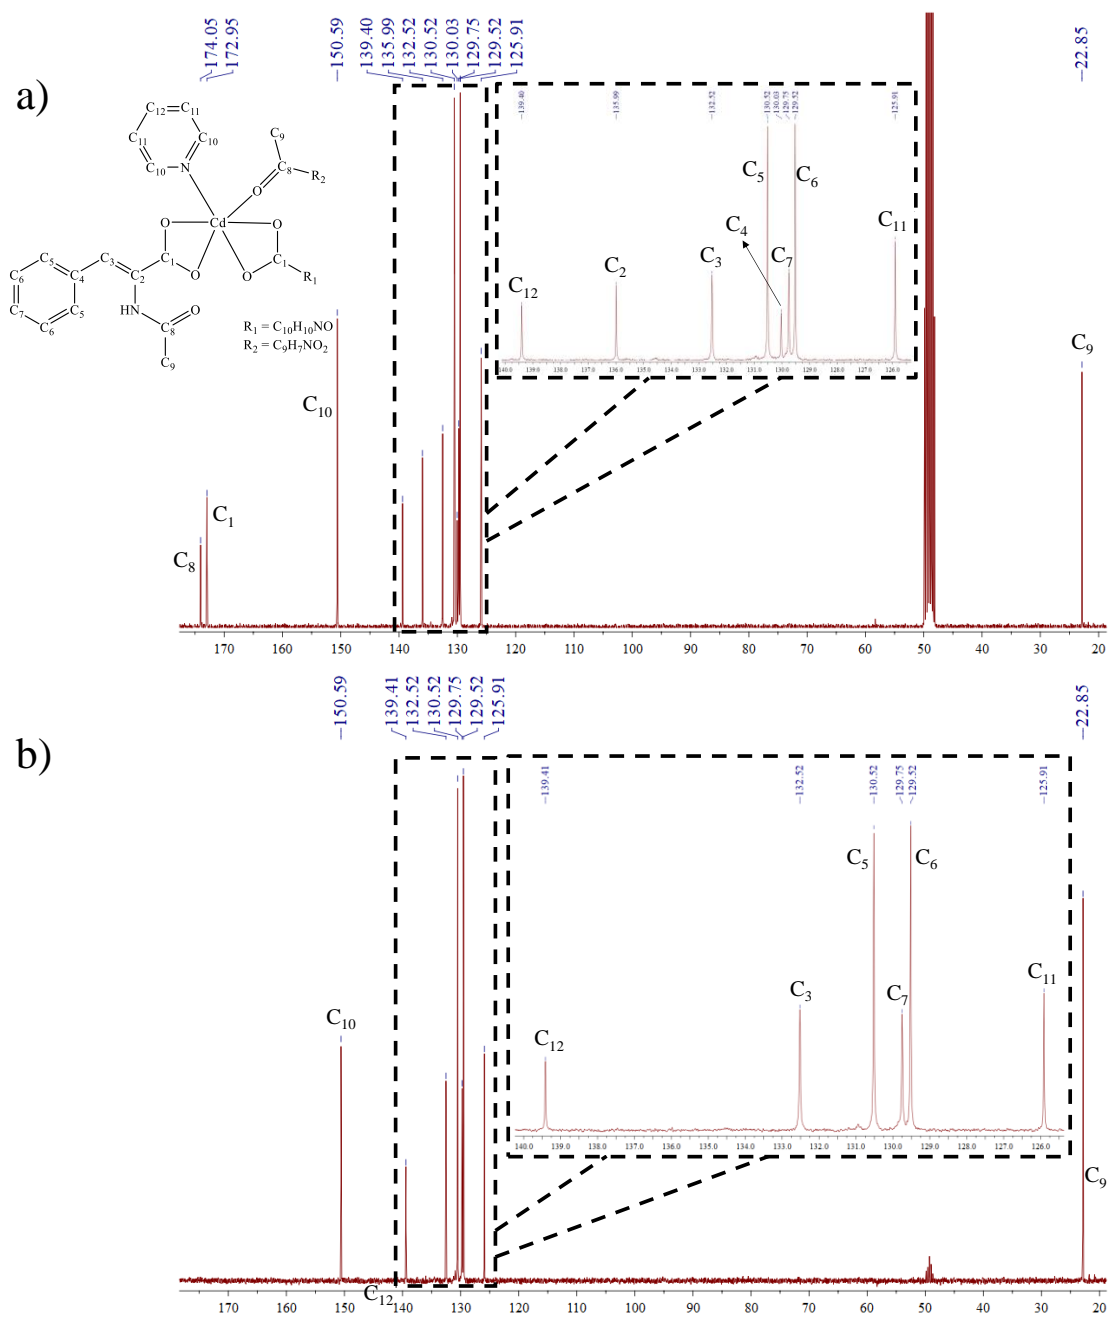

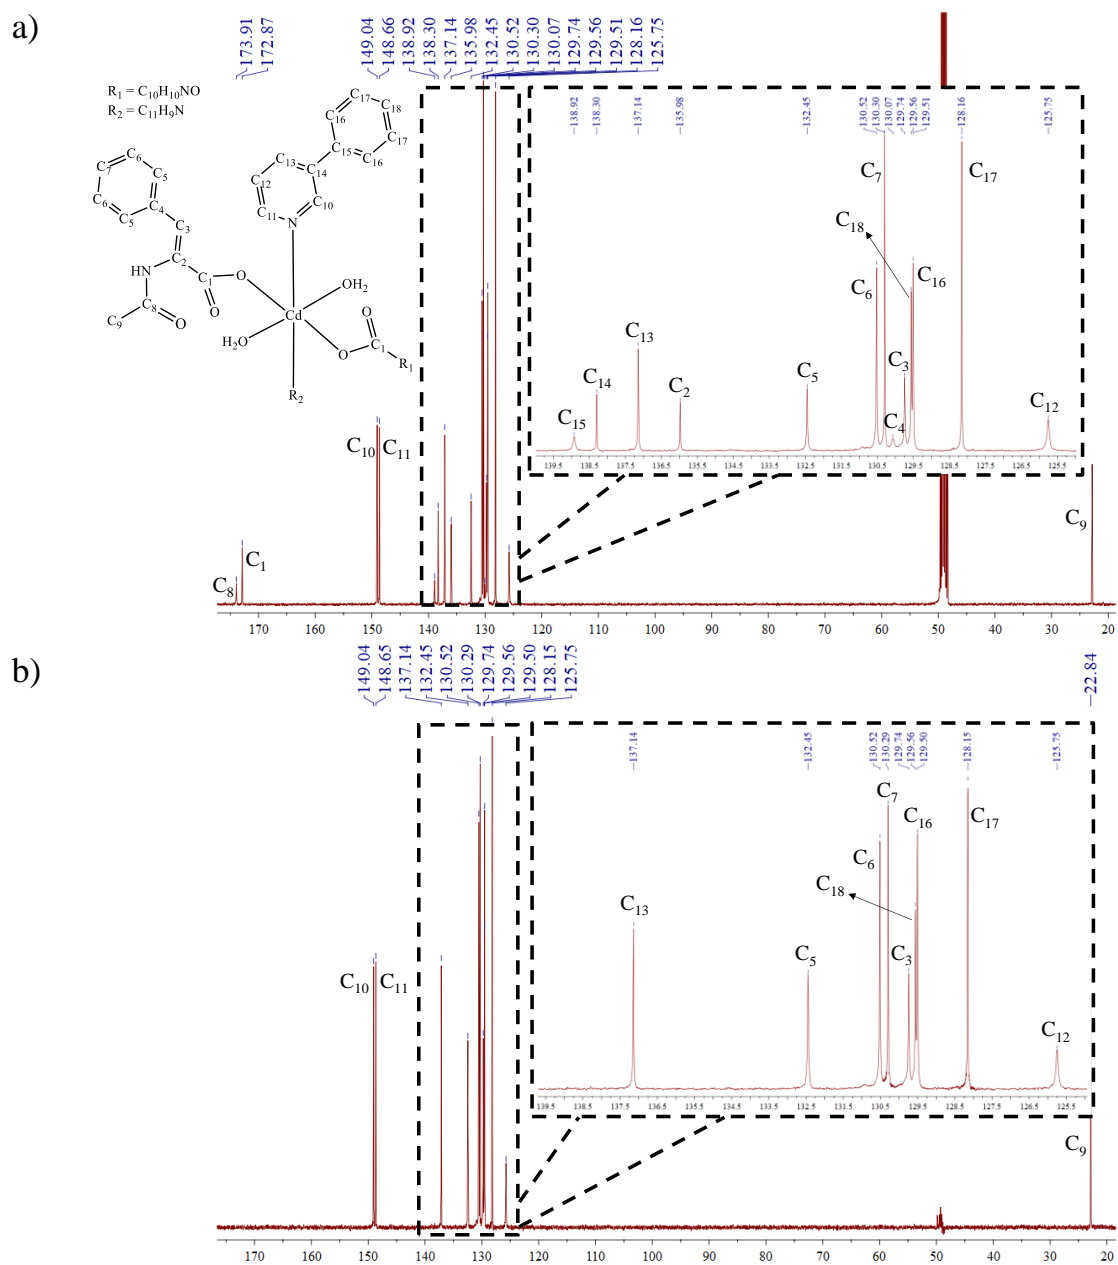

Figure S20. (a)  $^{13}C\{^1H\}$  and (b) DEPT-135 NMR spectra of compound  $[Cd(ACA)_2(3\text{-phy})_2(H_2O)_2] \cdot 2H_2O$  (**2**) recorded at 298 K in  $MeOH-d_4$ .



## Crystal structure analysis

Table S1. Selected bond lengths (Å), bond angles (°), intra- and intermolecular interactions (Å) for **1**.

| Bond lengths (Å)                |                                     |                    |                       |                                           |                                      |
|---------------------------------|-------------------------------------|--------------------|-----------------------|-------------------------------------------|--------------------------------------|
| Cd(1)-O(1)                      | 2.2502(14)                          | Cd(1)-O(5)#1       | 2.3239(14)            |                                           |                                      |
| Cd(1)-O(2)                      | 2.4639(13)                          | Cd(1)-O(6)         | 2.2788(12)            |                                           |                                      |
| Cd(1)-O(4)#1                    | 2.3457(13)                          | Cd(1)-N(3)         | 2.2669(16)            |                                           |                                      |
| Bond angles (°)                 |                                     |                    |                       |                                           |                                      |
| O(1)-Cd(1)-O(2)                 | 55.98(4)                            | O(6)-Cd(1)-O(2)    | 146.23(5)             |                                           |                                      |
| O(1)-Cd(1)-O(4)#1               | 90.91(5)                            | O(6)-Cd(1)-O(4)#1  | 98.81(4)              |                                           |                                      |
| O(1)-Cd(1)-O(5)#1               | 136.39(5)                           | O(6)-Cd(1)-O(5)#1  | 118.53(5)             |                                           |                                      |
| O(1)-Cd(1)-O(6)                 | 92.48(5)                            | N(3)-Cd(1)-O(2)    | 96.43(5)              |                                           |                                      |
| O(1)-Cd(1)-N(3)                 | 120.09(5)                           | N(3)-Cd(1)-O(4)#1  | 147.71(5)             |                                           |                                      |
| O(4)#1-Cd(1)-O(2)               | 93.88(5)                            | N(3)-Cd(1)-O(5)#1  | 91.96(5)              |                                           |                                      |
| O(5)#1-Cd(1)-O(2)               | 94.58(5)                            | N(3)-Cd(1)-O(6)    | 89.33(5)              |                                           |                                      |
| O(5)#1-Cd(1)-O(4)#1             | 56.69(5)                            |                    |                       |                                           |                                      |
| Intramolecular interactions (Å) |                                     |                    |                       |                                           |                                      |
| D-H...A                         | D-H (Å)                             | H...A (Å)          | D...A (Å)             | >D-H...A (°)                              |                                      |
| N(2)-H(2N)...O(3)               | 0.88                                | 2.05               | 2.917(2)              | 169                                       |                                      |
| C(16)-H(16)...O(3)              | 0.95                                | 2.46               | 3.341(2)              | 154                                       |                                      |
| C(22)-H(22B)...O(3)             | 0.98                                | 2.52               | 3.389(3)              | 148                                       |                                      |
| C(27)-H(27)...O(4)              | 0.95                                | 2.44               | 3.238(2)              | 142                                       |                                      |
| Cg(I)...Cg(J)                   | d <sub>Cg-Cg</sub> <sup>a</sup> (Å) | α <sup>b</sup> (°) | β, γ <sup>c</sup> (°) | d <sub>plane-plane</sub> <sup>d</sup> (Å) | d <sub>offset</sub> <sup>e</sup> (Å) |
| Cg(1)...Cg(2)                   | 3.6304(12)                          | 11.26(10)          | 20.6, 30.4            | 3.1297(8),<br>3.3987(8)                   | 1.27<br>1.84                         |
| Intermolecular interactions (Å) |                                     |                    |                       |                                           |                                      |
| D-H...A                         | D-H (Å)                             | H...A (Å)          | D...A (Å)             | >D-H...A (°)                              |                                      |
| N(1)-H(1N)...O(2)               | 0.84(3)                             | 2.10(3)            | 2.936(2)              | 174(3)                                    |                                      |
| C(18)-H(18)...Cg(3)             | 0.95                                | 2.58               | 3.445(2)              | 151                                       |                                      |

<sup>a</sup>Centroid-centroid distance. <sup>b</sup>Dihedral angle between the ring planes. <sup>c</sup>Offset angles: angle between Cg(I)-Cg(J) vector and normal to plane I, angle between Cg(I)-Cg(J) vector and normal to plane J (β = γ, when α = 0). <sup>d</sup>Perpendicular distance of Cg(I) on plane J and perpendicular distance of Cg(J) on plane I (equal when α = 0). <sup>e</sup>Horizontal displacement or slippage between Cg(I) and Cg(J) (equal for both centroids when α = 0). #1: -x+1/2, y-1/2, -z+1/2; Cg(1) = C(15) C(16) C(17) C(18) C(19) C(20); Cg(2) = N(3) C(23) C(24) C(25) C(26) C(27); Cg(3) = C(4) C(5) C(6) C(7) C(8) C(9)

Table S2. Selected bond lengths (Å), bond and torsion angles (°), intra- and intermolecular interactions (Å) for **2**.

| Bond lengths (Å)                |           |                   |            |              |
|---------------------------------|-----------|-------------------|------------|--------------|
| Cd(1)-O(1)                      | 2.2804(9) | Cd(1)-N(2)        | 2.3311(10) |              |
| Cd(1)-O(4)                      | 2.3134(9) |                   |            |              |
| Bond angles (°)                 |           |                   |            |              |
| O(1)-Cd(1)-O(1)#1               | 180       | O(4)-Cd(1)-O(4)#1 | 180        |              |
| O(1)-Cd(1)-O(4)                 | 91.26(3)  | O(4)-Cd(1)-N(2)   | 88.86(4)   |              |
| O(1)-Cd(1)-O(4)#1               | 88.74(3)  | O(4)-Cd(1)-N(2)#1 | 91.14(4)   |              |
| O(1)-Cd(1)-N(2)                 | 87.54(3)  | N(2)-Cd(1)-N(2)#1 | 180        |              |
| O(1)-Cd(1)-N(2)#1               | 92.46(4)  |                   |            |              |
| Torsion angle 3-ppy (°)         |           | 41.02             |            |              |
| Intramolecular interactions (Å) |           |                   |            |              |
| D-H...A                         | D-H (Å)   | H...A (Å)         | D...A (Å)  | >D-H...A (°) |
| O(4)-H(4OB)...O(2)              | 0.87(2)   | 1.81(2)           | 2.661(1)   | 165(2)       |
| Intermolecular interactions (Å) |           |                   |            |              |
| D-H...A                         | D-H (Å)   | H...A (Å)         | D...A (Å)  | >D-H...A (°) |
| O(4)-H(4OA)...O(1W)             | 0.81(2)   | 1.90(2)           | 2.713(2)   | 174(2)       |
| O(1W)-H(1WB)...O(3)             | 0.76(2)   | 1.95(2)           | 2.710(2)   | 170(2)       |
| C(15)-H(15)...O(1)              | 0.95      | 2.52              | 3.453(2)   | 167          |
| N(1)-H(1)...O(2)                | 0.88      | 2.02              | 2.855(1)   | 158          |
| C(8)-H(8)...O(4)                | 0.95      | 2.44              | 3.382(2)   | 172          |
| C(21)-H(21)...Cg(1)             | 0.95      | 2.97              | 3.7146(16) | 136          |

#1: -x+1, -y+1, -z+1. Cg(1) = N(2) C(12) C(13) C(14) C(15) C(16)

Table S3. Selected bond lengths (Å); bond and torsion angles (°); intra- and intermolecular interactions (Å) for **3**.

| Bond lengths (Å)                |            |                   |            |              |
|---------------------------------|------------|-------------------|------------|--------------|
| Cd(1)-O(1)                      | 2.4423(14) | Cd(1)-O(5)        | 2.3720(14) |              |
| Cd(1)-O(2)                      | 2.3512(13) | Cd(1)-N(3)        | 2.3162(16) |              |
| Cd(1)-O(2)#1                    | 2.4355(13) | Cd(1)-N(4)        | 2.3370(16) |              |
| Cd(1)-O(4)                      | 2.3550(13) |                   |            |              |
| Bond angles (°)                 |            |                   |            |              |
| O(1)-Cd(1)-O(2)                 | 54.58(4)   | O(2)#1-Cd(1)-O(4) | 101.77(5)  |              |
| O(1)-Cd(1)-O(2)#1               | 125.75(4)  | O(2)#1-Cd(1)-O(5) | 80.96(5)   |              |
| O(1)-Cd(1)-O(4)                 | 84.00(5)   | O(2)#1-Cd(1)-N(3) | 83.24(5)   |              |
| O(1)-Cd(1)-O(5)                 | 137.18(5)  | O(2)#1-Cd(1)-N(4) | 142.45(5)  |              |
| O(1)-Cd(1)-N(3)                 | 102.49(5)  | O(4)-Cd(1)-O(5)   | 55.84(5)   |              |
| O(1)-Cd(1)-N(4)                 | 87.25(5)   | O(4)-Cd(1)-N(3)   | 167.51(5)  |              |
| O(2)-Cd(1)-O(2)#1               | 71.17(5)   | O(4)-Cd(1)-N(4)   | 98.81(5)   |              |
| O(2)-Cd(1)-O(4)                 | 94.04(5)   | O(5)-Cd(1)-N(3)   | 114.55(5)  |              |
| O(2)-Cd(1)-O(5)                 | 133.63(5)  | O(5)-Cd(1)-N(4)   | 85.18(5)   |              |
| O(2)-Cd(1)-N(3)                 | 98.42(5)   | N(3)-Cd(1)-N(4)   | 71.16(6)   |              |
| O(2)-Cd(1)-N(4)                 | 138.10(5)  |                   |            |              |
| Torsion angle 2,2'-bipy (°)     |            | 16.95             |            |              |
| Intramolecular interactions (Å) |            |                   |            |              |
| D-H...A                         | D-H (Å)    | H...A (Å)         | D...A (Å)  | >D-H...A (°) |
| N(1)-H(1N)...O(5)               | 0.88       | 2.10              | 2.859(2)   | 144          |
| C(23)-H(23)...O(4)              | 0.95       | 2.41              | 3.311(2)   | 158          |
| Intermolecular interactions (Å) |            |                   |            |              |
| D-H...A                         | D-H (Å)    | H...A (Å)         | D...A (Å)  | >D-H...A (°) |
| N(2)-H(2N)...O(1)               | 0.88       | 2.04              | 2.890(2)   | 161          |
| C(31)-H(31)...O(3)              | 0.95       | 2.55              | 3.349(3)   | 142          |
| O(1W)-H(1WO)...O(6)             | 0.84       | 1.94              | 2.696(10)  | 149          |
| C(25)-H(25)...O(1W)             | 0.95       | 2.40              | 3.302(9)   | 159          |
| C(29)-H(29)...Cg(1)             | 0.95       | 2.84              | 3.612(2)   | 139          |

#1: -x, -y+1, -z+1. Cg(1) = C(4) C(5) C(6) C(7) C(8) C(9)

Table S4. Selected bond lengths (Å), bond and torsion angles (°), and intermolecular interactions (Å) for **4**.

| Bond lengths (Å)                |                   |                 |                       |                         |                    |
|---------------------------------|-------------------|-----------------|-----------------------|-------------------------|--------------------|
| Cd(1)-O(1)                      | 2.3637(14)        | Cd(1)-O(5)      | 2.3515(14)            |                         |                    |
| Cd(1)-O(2)                      | 2.3123(15)        | Cd(1)-N(3)      | 2.2979(16)            |                         |                    |
| Cd(1)-O(4)                      | 2.3412(13)        | Cd(1)-N(4)      | 2.2939(17)            |                         |                    |
| Bond angles (°)                 |                   |                 |                       |                         |                    |
| O(1)-Cd(1)-O(2)                 | 56.32(5)          | O(2)-Cd(1)-N(4) | 154.07(6)             |                         |                    |
| O(1)-Cd(1)-O(4)                 | 95.45(5)          | O(4)-Cd(1)-O(5) | 56.26(5)              |                         |                    |
| O(1)-Cd(1)-O(5)                 | 130.74(5)         | N(3)-Cd(1)-O(4) | 148.34(5)             |                         |                    |
| O(1)-Cd(1)-N(3)                 | 113.37(5)         | N(3)-Cd(1)-O(5) | 107.81(5)             |                         |                    |
| O(1)-Cd(1)-N(4)                 | 105.33(5)         | N(3)-Cd(1)-N(4) | 73.19(6)              |                         |                    |
| O(2)-Cd(1)-O(4)                 | 111.03(5)         | N(4)-Cd(1)-O(4) | 87.22(5)              |                         |                    |
| O(2)-Cd(1)-O(5)                 | 94.09(5)          | N(4)-Cd(1)-O(5) | 111.62(5)             |                         |                    |
| O(2)-Cd(1)-N(3)                 | 96.31(6)          |                 |                       |                         |                    |
| Torsion angles 1,10-phen (°)    |                   |                 |                       |                         |                    |
| Cg(1)-Cg(2)                     | 2.27              | Cg(2)-Cg(3)     | 1.96                  |                         |                    |
| Intermolecular interactions (Å) |                   |                 |                       |                         |                    |
| D-H...A                         | D-H (Å)           | H...A (Å)       | D...A (Å)             | >D-H...A (°)            |                    |
| N(2)-H(2N)...O(4)               | 0.88              | 1.94            | 2.789(2)              | 163                     |                    |
| O(1W)-H(1W)...O(2)              | 0.78(3)           | 1.99(3)         | 2.749(2)              | 164(3)                  |                    |
| C(18)-H(18)...O(6)              | 0.95              | 2.40            | 3.327(2)              | 165                     |                    |
| C(23)-H(23)...O(1W)             | 0.95              | 2.53            | 3.455(3)              | 163                     |                    |
| C(2W)-H(2WC)...O(3)             | 0.98              | 2.54            | 3.491(3)              | 165                     |                    |
| O(2W)-H(2OW)...O(3W)            | 0.84              | 1.95            | 2.788(3)              | 175                     |                    |
| N(1)-H(1N)...O(1W)              | 0.88              | 2.02            | 2.893(2)              | 170                     |                    |
| O(3W)-H(3OW)...O(6)             | 0.84              | 1.92            | 2.722(2)              | 159                     |                    |
| C(28)-H(28)...O(3)              | 0.95              | 2.32            | 3.037(3)              | 132                     |                    |
| Cg(I)...Cg(J)                   | $d_{Cg-Cg}^a$ (Å) | $\alpha^b$ (°)  | $\beta, \gamma^c$ (°) | $d_{plane-plane}^d$ (Å) | $d_{offset}^e$ (Å) |
| Cg(2)...Cg(2)                   | 3.5193(12)        | 0               | 18.5                  | 3.3367(8)               | 1.119              |
| Cg(4)...Cg(2)                   | 3.5862(11)        | 3.90(9)         | 21.7, 20.1            | 3.3676(8), 3.3311(8)    | 1.330, 1.232       |

<sup>a</sup>Centroid-centroid distance. <sup>b</sup>Dihedral angle between the ring planes. <sup>c</sup>Offset angles: angle between Cg(I)-Cg(J) vector and normal to plane I, angle between Cg(I)-Cg(J) vector and normal to plane J ( $\beta = \gamma$ , when  $\alpha = 0$ ). <sup>d</sup>Perpendicular distance of Cg(I) on plane J and perpendicular distance of Cg(J) on plane I (equal when  $\alpha = 0$ ). <sup>e</sup>Horizontal displacement or slippage between Cg(I) and Cg(J) (equal for both centroids when  $\alpha = 0$ ). Cg(1) = N(3) C(23) C(24) C(25) C(26) C(34); Cg(2) = C(26) C(27) C(28) C(29) C(33) C(34); Cg(3) = N(4) C(29) C(30) C(31) C(32) C(33); Cg(4) = C(15) C(16) C(17) C(18) C(19) C(20).

Table S5. Selected bond lengths (Å), bond and torsion angles (°), and intermolecular interactions (Å) for **5**.

| Bond lengths (Å)                |                                     |                    |                       |                                           |                                      |
|---------------------------------|-------------------------------------|--------------------|-----------------------|-------------------------------------------|--------------------------------------|
| Cd(1)-O(1)                      | 2.522(2)                            | Cd(1)-N(3)         | 2.333(2)              |                                           |                                      |
| Cd(1)-O(2)                      | 2.322(2)                            | Cd(1)-N(4)         | 2.338(2)              |                                           |                                      |
| Cd(1)-O(4)                      | 2.237(2)                            | Cd(1)-N(5)         | 2.382(2)              |                                           |                                      |
| Cd(1)-O(5)                      | 2.670(2)                            |                    |                       |                                           |                                      |
| Bond angles (°)                 |                                     |                    |                       |                                           |                                      |
| O(1)-Cd(1)-O(2)                 | 54.16(7)                            | O(4)-Cd(1)-O(5)    | 52.74(7)              |                                           |                                      |
| O(1)-Cd(1)-O(4)                 | 80.94(6)                            | O(4)-Cd(1)-N(3)    | 121.03(7)             |                                           |                                      |
| O(1)-Cd(1)-O(5)                 | 114.29(6)                           | O(4)-Cd(1)-N(4)    | 147.57(7)             |                                           |                                      |
| O(1)-Cd(1)-N(3)                 | 86.20(7)                            | O(4)-Cd(1)-N(5)    | 89.81(7)              |                                           |                                      |
| O(1)-Cd(1)-N(4)                 | 131.49(6)                           | O(5)-Cd(1)-N(3)    | 82.84(7)              |                                           |                                      |
| O(1)-Cd(1)-N(5)                 | 131.75(6)                           | O(5)-Cd(1)-N(4)    | 103.77(7)             |                                           |                                      |
| O(2)-Cd(1)-O(4)                 | 107.42(7)                           | O(5)-Cd(1)-N(5)    | 95.78(7)              |                                           |                                      |
| O(2)-Cd(1)-O(5)                 | 160.07(7)                           | N(3)-Cd(1)-N(4)    | 69.39(7)              |                                           |                                      |
| O(2)-Cd(1)-N(3)                 | 110.28(7)                           | N(3)-Cd(1)-N(5)    | 136.49(7)             |                                           |                                      |
| O(2)-Cd(1)-N(4)                 | 95.07(7)                            | N(4)-Cd(1)-N(5)    | 68.80(7)              |                                           |                                      |
| O(2)-Cd(1)-N(5)                 | 84.93(7)                            |                    |                       |                                           |                                      |
| Torsion angles terpy (°)        |                                     |                    |                       |                                           |                                      |
| Cg(1)-Cg(2)                     | 5.81                                | Cg(1)-Cg(3)        | 13.99                 |                                           |                                      |
| Intermolecular interactions (Å) |                                     |                    |                       |                                           |                                      |
| D-H...A                         | D-H (Å)                             | H...A (Å)          | D...A (Å)             | >D-H...A (°)                              |                                      |
| N(1)-H(1N)...O(1)               | 0.88                                | 2.07               | 2.906(3)              | 158                                       |                                      |
| C(11)-H(11B)...O(4)             | 0.98                                | 2.35               | 3.327(3)              | 177                                       |                                      |
| C(34)-H(34)...O(5)              | 0.95                                | 2.42               | 3.243(3)              | 144                                       |                                      |
| C(26)-H(26)...O(3)              | 0.95                                | 2.52               | 3.358(3)              | 147                                       |                                      |
| C(16)-H(16)...O(8)              | 0.95                                | 2.47               | 3.392(6)              | 165                                       |                                      |
| C(24)-H(24)...O(8)              | 0.95                                | 2.35               | 3.146(5)              | 142                                       |                                      |
| N(2)-H(2)...O(7)                | 0.88                                | 1.97               | 2.835(3)              | 166                                       |                                      |
| C(22)-H(22C)...O(7)             | 0.98                                | 2.52               | 3.382(4)              | 147                                       |                                      |
| C(19)-H(19)...O(7)              | 0.95                                | 2.56               | 3.424(7)              | 151                                       |                                      |
| Cg(I)...Cg(J)                   | d <sub>Cg-Cg</sub> <sup>a</sup> (Å) | α <sup>b</sup> (°) | β, γ <sup>c</sup> (°) | d <sub>plane-plane</sub> <sup>d</sup> (Å) | d <sub>offset</sub> <sup>e</sup> (Å) |
| Cg(1)...Cg(2)                   | 3.5649(14)                          | 5.81(12)           | 18.0,<br>23.0         | 3.2806(10),<br>3.3895(10)                 | 1.101,<br>1.393                      |
| Cg(3)...Cg(1)                   | 3.8055(15)                          | 13.99(13)          | 20.9,<br>34.5         | 3.1367(12),<br>3.5544(10)                 | 1.358,<br>2.155                      |

<sup>a</sup>Centroid-centroid distance. <sup>b</sup>Dihedral angle between the ring planes. <sup>c</sup>Offset angles: angle between Cg(I)-Cg(J) vector and normal to plane I, angle between Cg(I)-Cg(J) vector and normal to plane J (β = γ, when α = 0). <sup>d</sup>Perpendicular distance of Cg(I) on plane J and perpendicular distance of Cg(J) on plane I (equal when α = 0). <sup>e</sup>Horizontal displacement or slippage between Cg(I) and Cg(J) (equal for both centroids when α = 0). Cg(1) = N(4) C(28) C(29) C(30) C(31) C(32); Cg(2) = N(5) C(33) C(34) C(35) C(36) C(37); Cg(3) = N(3) C(23) C(24) C(25) C(26) C(27).

## Structural Comparison

Table S6. Structural parameters regarding the steric effects of the ligands in **1-5**<sup>a</sup>.

| Compound | Chelate angle ACA (°) | Bite angle dPy (°) | Outer atom angle <sup>1</sup> (°) |
|----------|-----------------------|--------------------|-----------------------------------|
| <b>1</b> | 55.98(5), 56.69(5)    | -                  | 77.04                             |
| <b>2</b> | -                     | -                  | 83.70                             |
| <b>3</b> | 54.58(5), 55.84(5)    | 71.17(6)           | 144.05                            |
| <b>4</b> | 56.26(5), 56.32(5)    | 73.19(6)           | 144.63                            |
| <b>5</b> | 52.74(7), 54.16(7)    | 68.80(7), 69.39(7) | 217.36                            |

<sup>a</sup>The outer atom angles have been calculated using the two outer hydrogen atoms placed at the sides of the dPy ligands

## UV-Vis and photoluminescence data

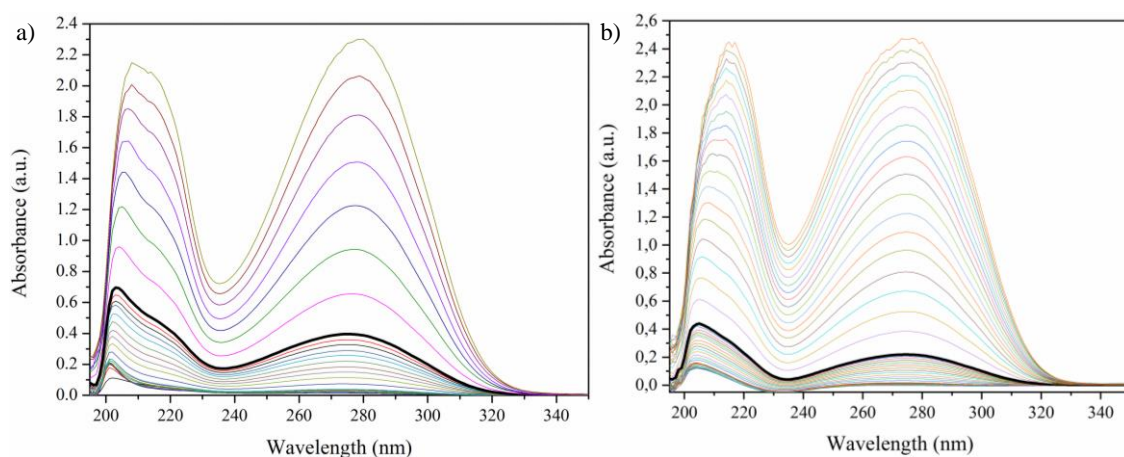

Figure S21. UV-Vis spectra of (a) HACA ligand and (b) ACA<sup>-</sup> anion recorded at 298K, within a concentration range from  $\sim 1 \cdot 10^{-9}$  to  $\sim 1 \cdot 10^{-4}$  M.

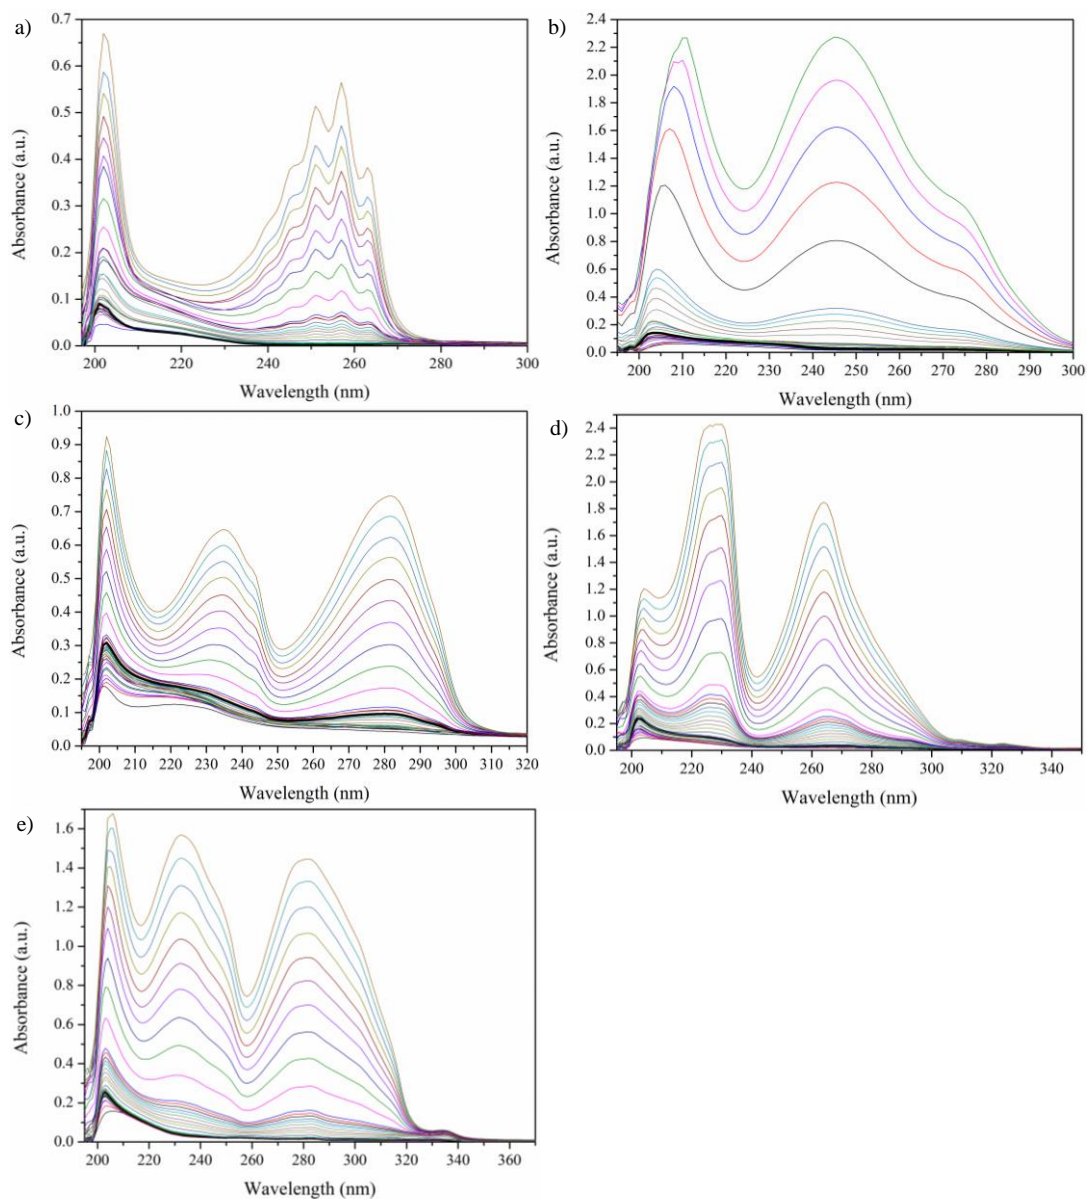

Figure S22. UV-Vis spectra of dPy ligands: (a) py; (b) 3-phpy; (c) 2,2'-bipy; (d) 1,10-phen and (e) terpy recorded at 298K, within a concentration range from  $\sim 1 \cdot 10^{-9}$  to  $\sim 1 \cdot 10^{-4}$  M.

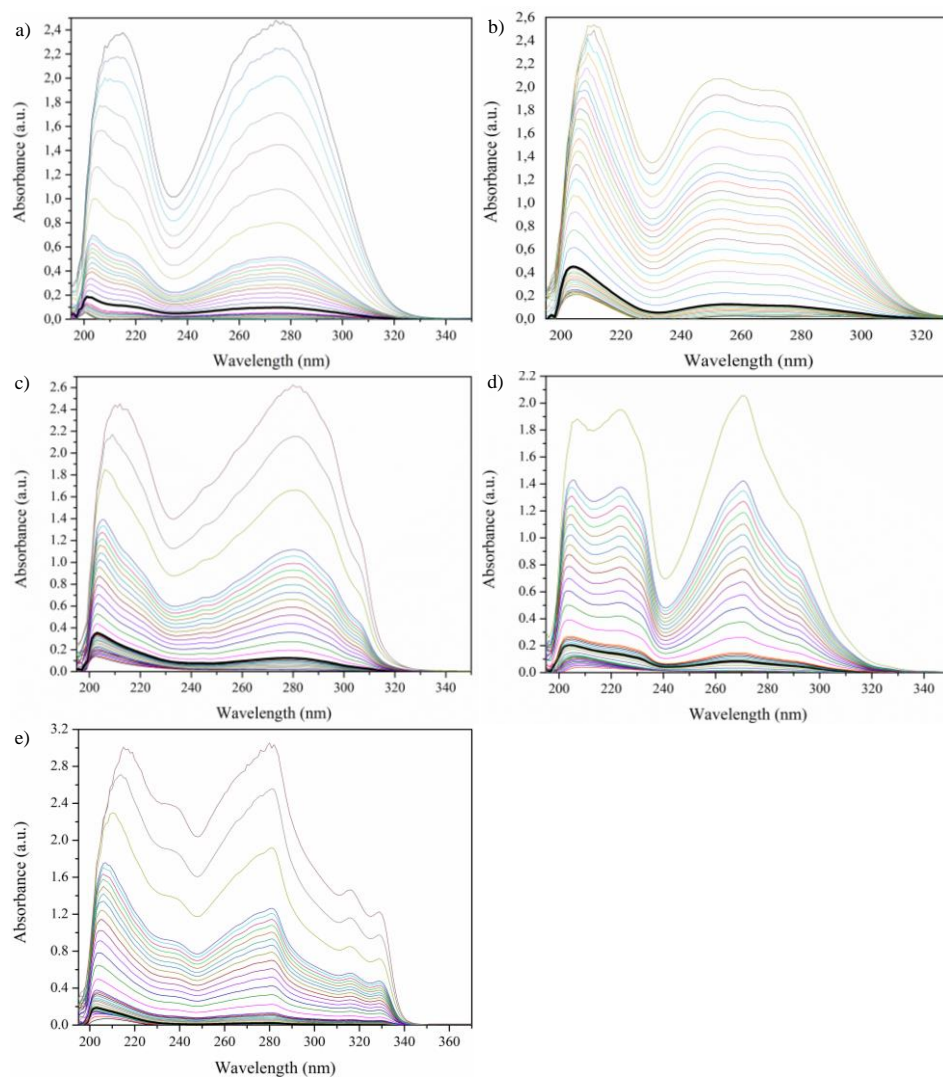

Figure S23. UV-Vis spectra of complexes **1-5** recorded at 298K, within a concentration range from  $\sim 1 \cdot 10^{-9}$  to  $\sim 1 \cdot 10^{-4}$  M. (a) **1**; (b) **2**; (c) **3**; (d) **4** and (e) **5**.

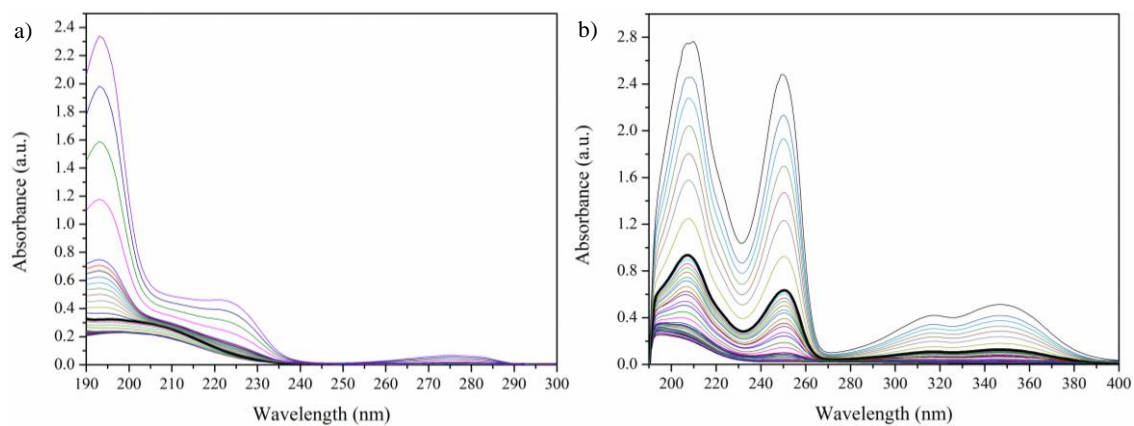

Figure S24. UV-Vis spectra of standards (a) L-tyrosine (L-tyr) and (b) quinine sulphate (QS) recorded at 298K, within a concentration range from  $\sim 1 \cdot 10^{-9}$  to  $\sim 1 \cdot 10^{-4}$  M.

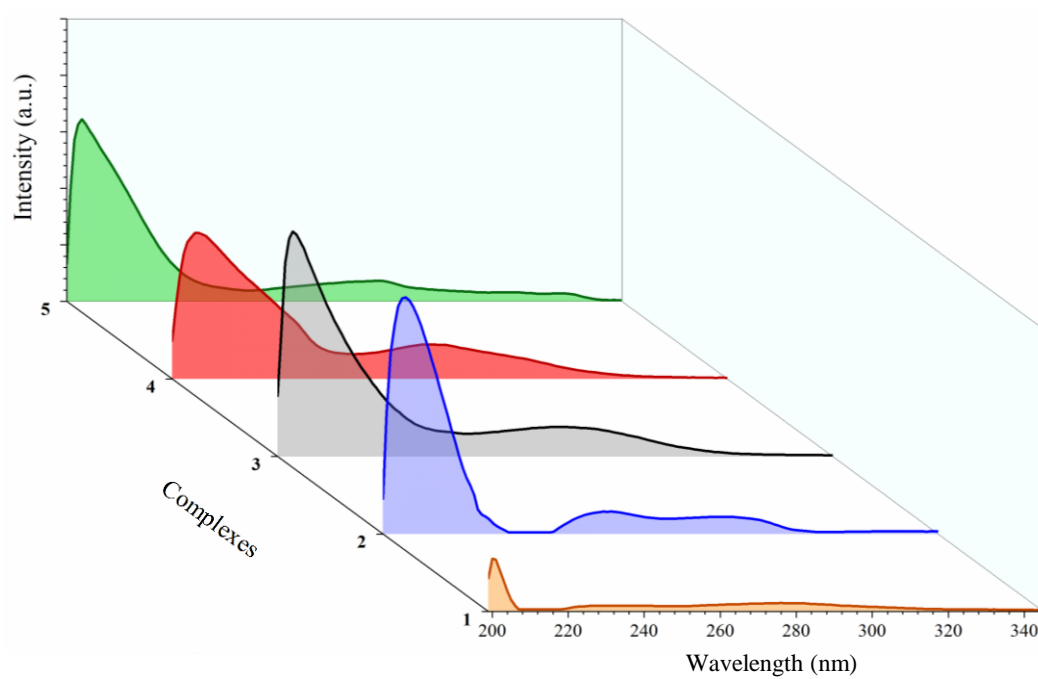

Figure S25. UV-Vis spectra of complexes **1-5** recorded at 298 K at a concentration of  $1.00 \cdot 10^{-7}$  M.

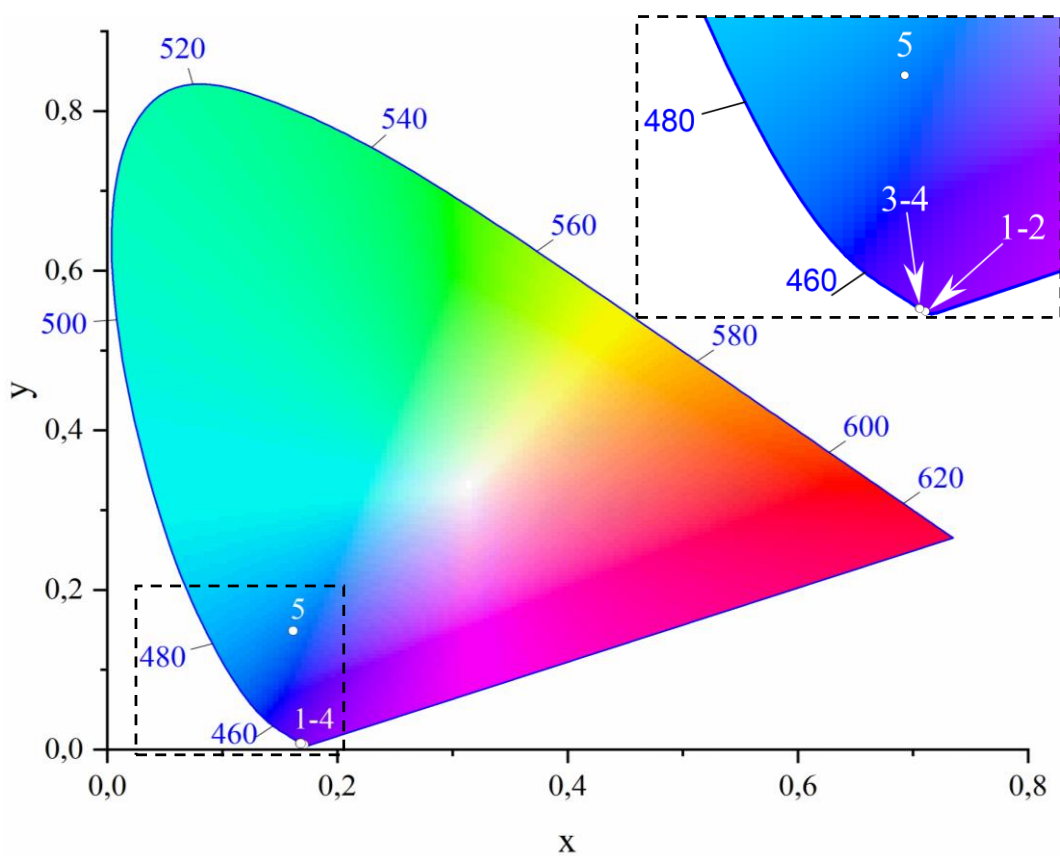

Figure S26. CIE 1931 chromaticity diagram of compounds **1-5**.

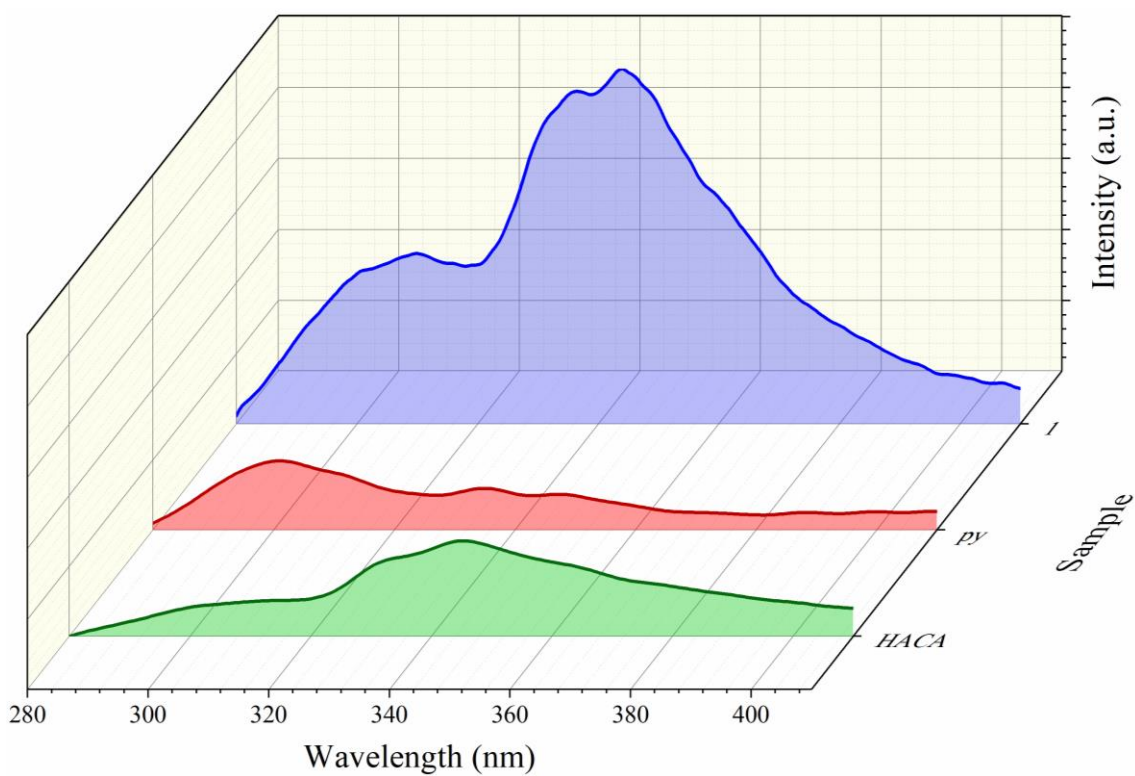

Figure S27. Emission spectra of **1** and their corresponding ligands (HACA and py) irradiated at the excitation maxima of **1** using  $1.00 \cdot 10^{-7}$  M solutions.

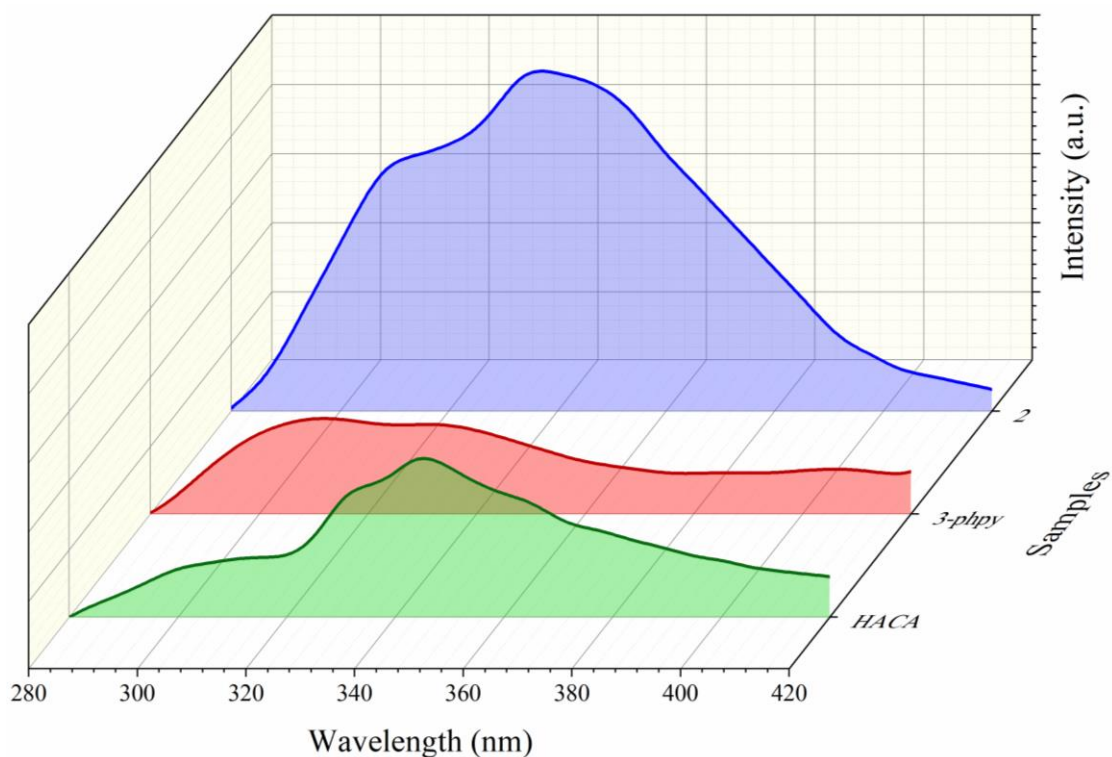

Figure S28. Emission spectra of **2** and their corresponding ligands (HACA and 3-ppy) irradiated at the excitation maxima of **2** using  $1.00 \cdot 10^{-7}$  M solutions.



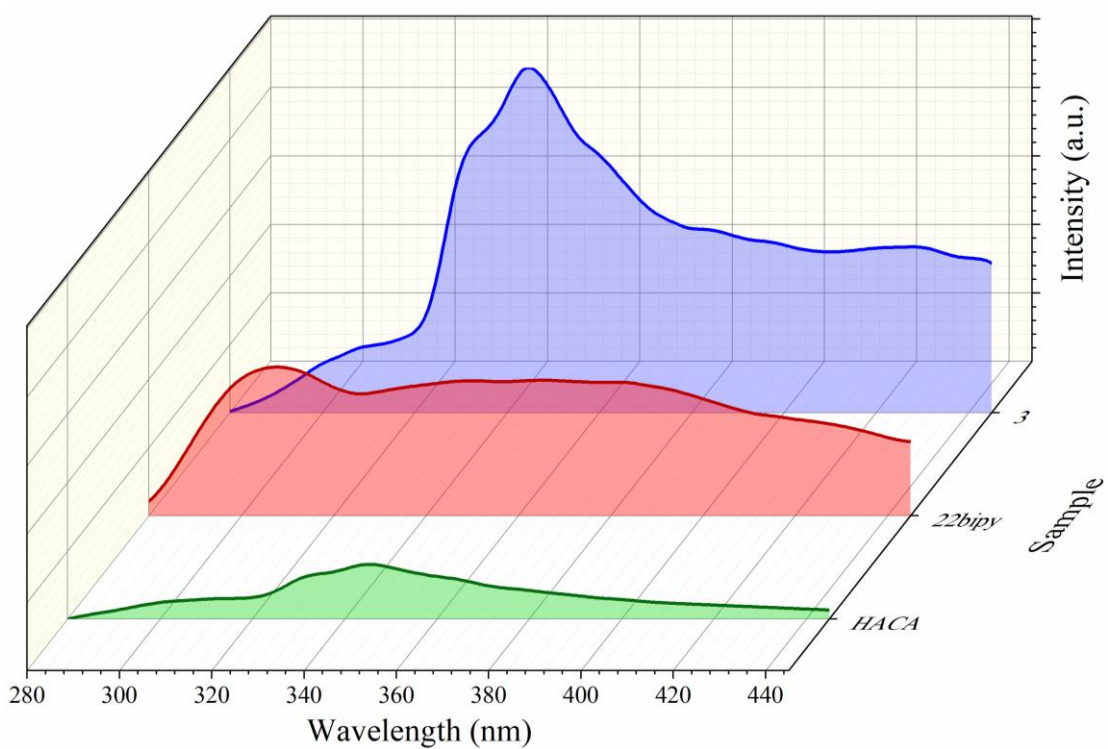

Figure S29. Emission spectra of **3** and their corresponding ligands (HACA and 2,2'-bipy) irradiated at the excitation maxima of **3** using  $1.00 \cdot 10^{-7}$  M solutions.

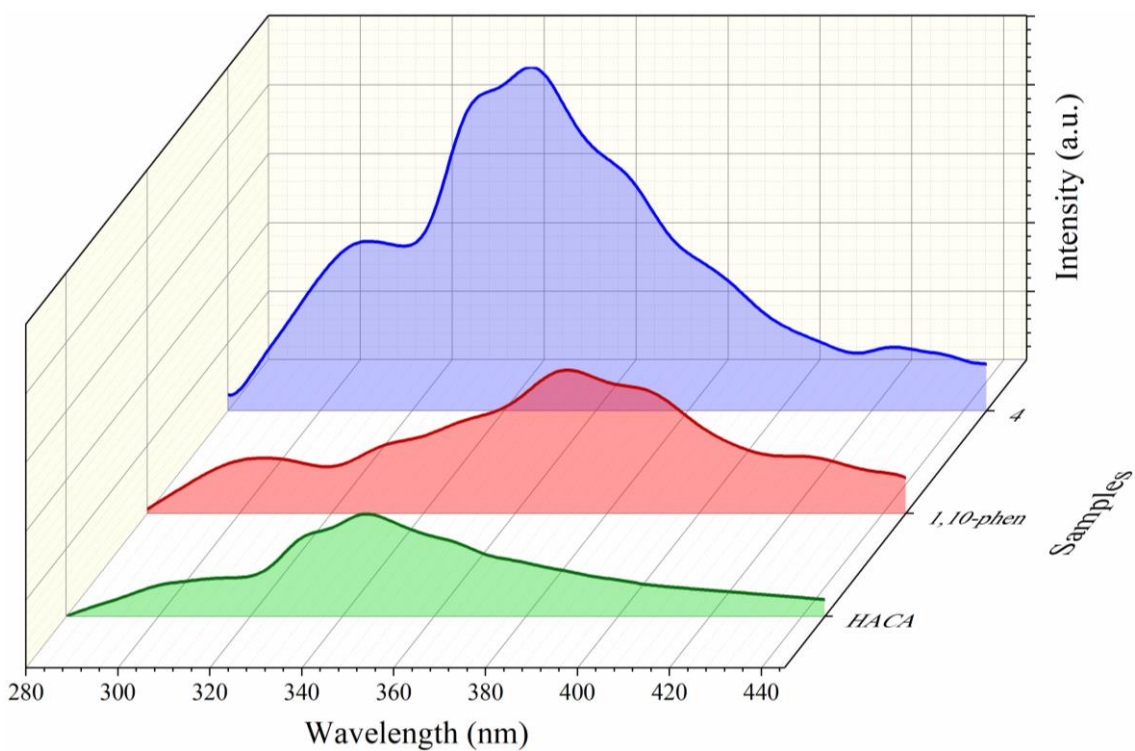

Figure S30. Emission spectra of **4** and their corresponding ligands (HACA and 1,10-phen) irradiated at the excitation maxima of **4** using  $1.00 \cdot 10^{-7}$  M solutions.

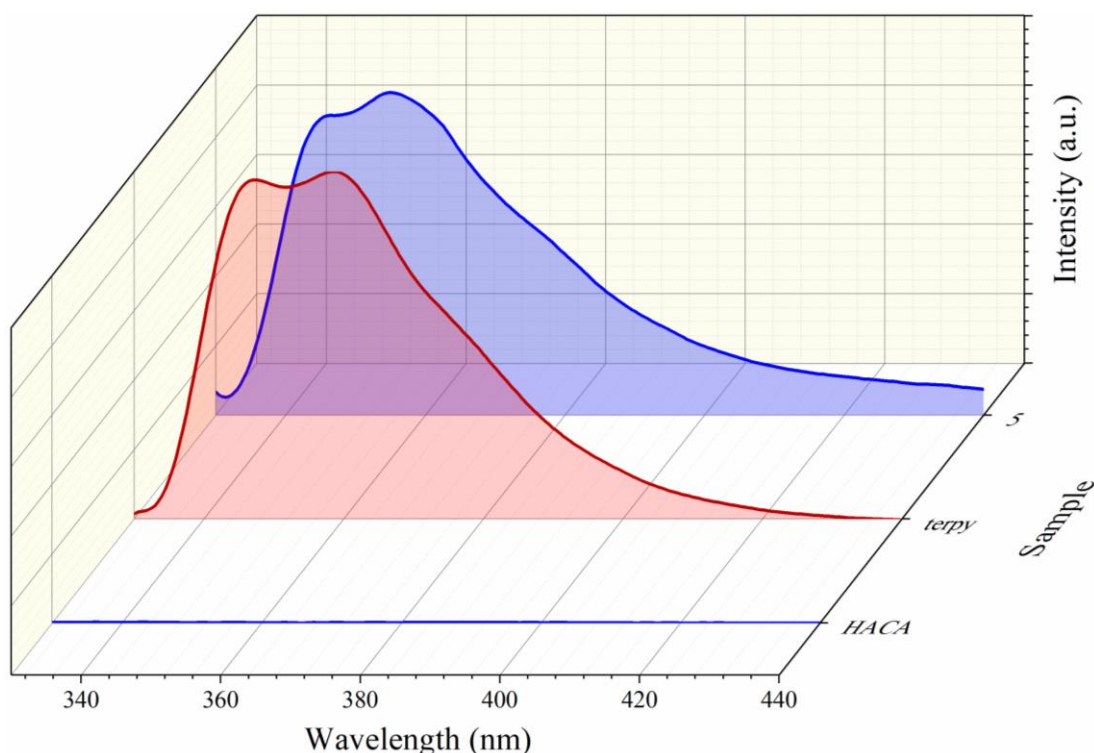

Figure S31. Emission spectra of **5** and their corresponding ligands (HACA and terpy) irradiated at the excitation maxima of **5** using  $1.00 \cdot 10^{-7}$  M solutions.

Table S7. Detailed parameters extracted from the photophysical properties of L-tyr, QS, HACA and dPy ligands<sup>a</sup>.

| Sample    | $\lambda_{\text{max-abs}}$ (log( $\epsilon$ ))             | $\lambda_{\text{ex}}$ (nm) | $\lambda_{\text{max-em}}$ (nm) | $\Phi_s$           |
|-----------|------------------------------------------------------------|----------------------------|--------------------------------|--------------------|
| L-tyr     | 197 (5.26), 228 (3.78), 278 (3.07)                         | 275                        | 315                            | 0.14               |
| QS        | 207(4.65), 250(4.60), 315(3.64), 347(3.74)                 | 350                        | 455                            | 0.577              |
| HACA      | 201 (4.58), 218 (4.61) 272 (4.44)                          | 229                        | 345                            | 0.039 <sup>b</sup> |
|           |                                                            | 320                        | -                              | - <sup>c</sup>     |
| py        | 201 (4.05), 249 (3.64), 252 (3.72), 255 (3.69), 263 (3.60) | 229                        | 301                            | 0.046 <sup>b</sup> |
| 3-phen    | 204(4.44), 245(4.23), 275(3.90)                            | 229                        | 312                            | 0.013 <sup>b</sup> |
| 2,2'-bipy | 202(4.00), 231(3.84), 243(3.79), 280(3.94)                 | 229                        | 308                            | 0.039 <sup>b</sup> |
| 1,10-phen | 202(4.38), 226(4.60), 264(4.44), 308(3.10)                 | 229                        | 371                            | 0.023 <sup>b</sup> |
| terpy     | 203(4.41), 231(4.30), 277(4.26), 283(4.25), 333(3.20)      | 320                        | 359                            | 0.11 <sup>d</sup>  |

<sup>a</sup>All the wavelengths are given in nm.  $\epsilon$  values are given in  $\text{M}^{-1} \cdot \text{cm}^{-1}$ .  $\lambda_{\text{max-abs}}$  = maximum of absorption;  $\lambda_{\text{ex}}$  = excitation maximum;  $\lambda_{\text{max-em}}$  = maximum of emission. <sup>b</sup>Relative quantum yield values using L-tyrosine as standard ( $\Phi_s = 0.14$ ).<sup>2</sup> <sup>c</sup>Non-fluorescent samples at the selected excitation wavelength. <sup>d</sup>Relative quantum yield values using quinine sulphate as standard ( $\Phi_s = 0.577$ ).<sup>3</sup>

## References

- 1 F. Sánchez-Férez, J. M. Rius-Bartra, T. Calvet, M. Font-Bardia and J. Pons, *Inorg. Chem.*, 2021, **60**, 3851–3870.
- 2 R. F. Chen, *Anal. Lett.*, 1967, **1**, 35–42.
- 3 J. W. Eastman, *Photochem. Photobiol.*, 1967, **6**, 55–72.
